# Supplementary material for: Low income is associated with poor adherence to a Mediterranean diet and a higher prevalence of obesity: cross-sectional results from the Moli-sani study
Source: PubMed Central journal article supplement — BMJ Open. 2012 Nov 19;2(6):e001685. doi: 10.1136/bmjopen-2012-001685 (PMC3533017; doi:10.1136/bmjopen-2012-001685), 2012-11-19
Supplement: bmjopen-2012-001685.draft_revisions.pdf [file bmjopen-2012-001685.draft_revisions.pdf]

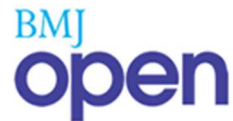

**Low income is associated with poor adherence to Mediterranean Diet and higher prevalence of obesity: results from the Moli-sani study**

|                                    |                                                                                                                                                                                                                                                                                                                                                                                                                                                                                                                                                                |
|------------------------------------|----------------------------------------------------------------------------------------------------------------------------------------------------------------------------------------------------------------------------------------------------------------------------------------------------------------------------------------------------------------------------------------------------------------------------------------------------------------------------------------------------------------------------------------------------------------|
| Journal:                           | <i>BMJ Open</i>                                                                                                                                                                                                                                                                                                                                                                                                                                                                                                                                                |
| Manuscript ID:                     | bmjopen-2012-001685                                                                                                                                                                                                                                                                                                                                                                                                                                                                                                                                            |
| Article Type:                      | Research                                                                                                                                                                                                                                                                                                                                                                                                                                                                                                                                                       |
| Date Submitted by the Author:      | 20-Jun-2012                                                                                                                                                                                                                                                                                                                                                                                                                                                                                                                                                    |
| Complete List of Authors:          | Bonaccio, Marialaura; Fondazione Giovanni Paolo II, Research Laboratories<br>Bonanni, Americo; Fondazione Giovanni Paolo II, Research Laboratories<br>Di Castelnuovo, Augusto; Fondazione Giovanni Paolo II, Research<br>Laboratories<br>De Lucia, Francesca; Fondazione Giovanni Paolo II, Research Laboratories<br>Donati, Maria Benedetta; Fondazione Giovanni Paolo II, Research<br>Laboratories<br>de Gaetano, Giovanni; Fondazione Giovanni Paolo II, Research<br>Laboratories<br>Iacoviello, Licia; Fondazione Giovanni Paolo II, Research Laboratories |
| <b>Primary Subject<br>Heading</b>: | Epidemiology                                                                                                                                                                                                                                                                                                                                                                                                                                                                                                                                                   |
| Secondary Subject Heading:         | Nutrition and metabolism, Public health, Health economics                                                                                                                                                                                                                                                                                                                                                                                                                                                                                                      |
| Keywords:                          | EPIDEMIOLOGY, NUTRITION & DIETETICS, PUBLIC HEALTH, HEALTH<br>ECONOMICS                                                                                                                                                                                                                                                                                                                                                                                                                                                                                        |
|                                    |                                                                                                                                                                                                                                                                                                                                                                                                                                                                                                                                                                |

SCHOLARONE™  
Manuscripts

1  
2  
3  
4 **Low income is associated with poor adherence to Mediterranean Diet and higher prevalence**  
5 **of obesity: results from the Moli-sani study**  
6  
7

8  
9  
10 Marialaura Bonaccio, research fellow\*, Americo Bonanni, research fellow \*, Augusto Di  
11 Castelnuovo, postdoctoral researcher\*\*, Francesca De Lucia, research fellow \*, Maria Benedetta  
12 Donati, scientific coordinator\*\*\*, Giovanni de Gaetano, head of department\*\*\* and Licia  
13 Iacoviello, head of laboratory\*\* and on behalf of the Moli-sani Project Investigators<sup>o</sup>  
14  
15  
16  
17  
18  
19  
20

21  
22 \*Science Communication Unit, \*\*Laboratory of Genetic and Environmental Epidemiology,  
23

24 \*\*\*Research Laboratories, Fondazione di Ricerca e Cura “Giovanni Paolo II”, Largo Gemelli, 1  
25  
26 86100 Campobasso, Italy  
27

28 <sup>o</sup>MOLI-SANI Project Investigators are listed in the Appendix 1 (Web only file)  
29  
30  
31  
32

33 **Keywords:** Obesity; Diet, Mediterranean; Social Class; Public Health; Cardiovascular Diseases  
34

35 **Word count:** 3,212  
36  
37  
38  
39

40 **Corresponding Author:**

41 Licia Iacoviello  
42 Laboratori di Ricerca  
43 Fondazione di Ricerca e Cura “Giovanni Paolo II”  
44 Largo Gemelli, 1  
45 86100 CAMPOBASSO, Italy  
46 Phone: +39 0874 312 274  
47 Fax: +39 0874 312 710  
48 E-mail: [licia.iacoviello@moli-sani.org](mailto:licia.iacoviello@moli-sani.org)  
49  
50  
51  
52  
53  
54  
55  
56  
57  
58  
59  
60

## ABSTRACT

**Objectives:** To assess differences in eating patterns among adult Italians with different socio-economic status, with particular focus on income.

**Design:** Cross-sectional study on a sample of Italian subjects enrolled in the Moli-sani Project, a population-based cohort study.

The Italian EPIC food frequency questionnaire was used to determine food intake. Adherence to Mediterranean diet (MD) was appraised according to the Mediterranean score elaborated by Trichopoulou (MDS) and the novel Italian Mediterranean Index (IMI) and to an *a posteriori* score derived from principal component analysis. Four income categories were identified.

**Setting:** Molise region, Italy

**Participants:** 13,262 subjects (mean age 53±11, 50% men) enrolled in the Moli-sani Project which randomly recruited 24,318 citizens (age ≥35).

**Main outcomes:** Dietary patterns and risk factors for cardiovascular disease.

**Results:** Higher income groups were significantly associated with greater adherence to MD ( $p < .0001$ ) and to Olive oil and Vegetables dietary pattern in multivariable model including age, sex, daily energy intake, BMI, physical activity, smoking, alcohol consumption and education. The odds of having highest adherence to MD clearly increased according to income levels. People having the highest income had 56% (95% CI: 24% to 96%, MDS) or 68% (95% CI: 33% to 112%, IMI) higher probability to stick to a Mediterranean diet-like eating pattern than those in the lowest income group. Obesity prevalence was higher in the lowest-income group (36%) in comparison with the highest- income category (20%,  $p < .0001$ ). Similar results were found for high educated group.

**Conclusions:** Higher income and education are associated with greater adherence to Mediterranean diet-like eating patterns and lower prevalence of obesity. The increasing prices of the basic Mediterranean food items seem to represent a real obstacle to healthy diet driving people to choose

1  
2  
3  
4  
5  
6  
7  
8  
9  
10  
11  
12  
13  
14  
15  
16  
17  
18  
19  
20  
21  
22  
23  
24  
25  
26  
27  
28  
29  
30  
31  
32  
33  
34  
35  
36  
37  
38  
39  
40  
41  
42  
43  
44  
45  
46  
47  
48  
49  
50  
51  
52  
53  
54  
55  
56  
57  
58  
59  
60

alternative ways of eating usually inspired by the need to save money in everyday life.

For peer review only

## INTRODUCTION

Mediterranean Diet (MD) has been shown to offer protection against cardiovascular disease, some types of cancer, and neurodegenerative diseases (1,2) and recently the UNESCO committee inscribed it on the list of Intangible Heritage (3). The main food components of the MD are vegetables, fruits, cereals, fish, olive oil as main fat source and moderate red wine consumption.

Despite the widely proven benefits of the diet discovered by Ancel Keys (4) in the Fifties, the Southern European countries in which Mediterranean diet originated are rapidly withdrawing from this eating pattern orienting their food choices toward products typical of the Western diet (WD) which is rich in refined grains, saturated fats, sugars, red and processed meat. The reasons why people keep on drifting from one dietary regimen to another remain open to several hypotheses (2). Social changes appear to have contributed to radical reversal in dietary habits in Western and Southern Europe societies although developing countries are slightly turning into westernized diets as well (5).

Increasing prices of many of the basic food items of MD seem to have led people to give up this eating pattern in favour of less expensive products which allow to save money but are definitively unhealthy (6).

Many studies suggest that diet quality follows a socio-economic gradient highlighting how disadvantaged people present higher rates of obesity, diabetes, cardiovascular disease and some types of cancer (7).

The abandon of MD is also considered as a possible cause of the increasing obesity pandemic (8).

Several studies made a further step forward in order to see whether there is an association between diet cost and obesity, finding out that higher adherence to healthy dietary patterns is linked to higher monetary costs and is inversely associated with BMI and obesity (9).

The aim of the present study was to assess possible differences in eating patterns among adult Italians with different socio-economic status, with particular focus on low-income, in order to

1  
2  
3  
4 reinforce the assumption that encouraging people to adopt healthy eating behaviours is not just a  
5  
6 matter of good willing but mainly an issue which should lead to concrete measures of intervention  
7  
8 in terms of economic availability. Our study aimed also at evaluating a potential relationship  
9  
10 between low-income and obesity or overweight.  
11

## 12 13 14 15 **MATERIAL AND METHODS**

### 16 17 **Study population**

18  
19 The Moli-sani Project is a population-based cohort study which randomly recruited 24,325 citizens  
20  
21 of the Molise, a region placed between Central and Southern Italy. Between March 2005 and April  
22  
23 2010, the study enrolled men and women aged  $\geq 35$  years, randomly recruited from subjects  
24  
25 included in the city-hall registries of Molise (10). Exclusion criteria were pregnancy, disturbances  
26  
27 in understanding/ willing processes, ongoing poly-traumas or coma, refusal to sign the informed  
28  
29 consent.  
30  
31

32  
33 After exclusion of subjects reporting cardiovascular disease (5.7%), cancer (3.1%) or diabetes  
34  
35 (6.0%) and of those for whom there were no information available on income (30.7%) because they  
36  
37 refused to answer or did not know about this issue, 13,262 subjects were analysed. The latter  
38  
39 subjects were comparable with the whole Moli-sani Project population in terms of Mediterranean  
40  
41 dietary patterns and socio-economic features, whereas mean age of the sample was slightly lower  
42  
43 ( $53.3 \pm 11$  vs  $55.0 \pm 12$ ) and had a higher prevalence of men (50% vs 48%) compared with the  
44  
45 whole population.  
46  
47

### 48 49 50 **Dietary information**

51  
52 The validated Italian EPIC food frequency questionnaire was used to determine food intake (11,  
53  
54 12). The questionnaire, computerized with tailor-made software, allowed to interview participants  
55  
56 in an interactive way, including illustrations of sample dishes of definite sizes or by reference to  
57  
58  
59  
60

1  
2  
3  
4 standard portion sizes. To simplify interpretation of data and to minimize within-person variations  
5  
6 in intakes of individual foods, 188 food items were classified into 45 predefined food groups on the  
7  
8 basis of similar nutrient characteristics or culinary usage (Appendix 2). (Web only file).

9  
10 Moderate alcohol intake was defined as regularly drinking less than two or one drinks a day,  
11  
12 respectively for men and women.

13  
14 Food consumption patterns were generated by using Principal Components Analysis (PCA)  
15  
16 conducted on the correlation matrix of 45 food groups (13). Three main factors emerged, in  
17  
18 agreement with previous findings in the same population (13) . The first pattern, identified as  
19  
20 “Olive Oil and Vegetables”, was characterized by high positive loadings for olive oil, vegetables,  
21  
22 legumes, soups, fruits and fish. The second pattern, named “Pasta and Meat”, was characterized by  
23  
24 high positive loadings for pasta, cooked tomatoes, red meat, animal fats and alcoholic beverages,  
25  
26 and negative loadings of breakfast cereals and yogurt. The “Eggs and Sweets” pattern was  
27  
28 characterized by high positive loadings for eggs, margarines, processed meat and sugar and sweets.  
29  
30

31  
32 We evaluated the adherence to the Mediterranean diet by using the Mediterranean Diet Score  
33  
34 (MDS) elaborated by Trichopoulou et al (14) which is obtained by assigning a value of 0 or 1 to  
35  
36 each of 9 indicated components (vegetables, legumes, fruits, cereals, fish, meat, dietary products,  
37  
38 ethanol, lipids) with the use of the sex-specific median as cut-off. The total Mediterranean- diet  
39  
40 score ranged from 0, which indicates the minimal adherence to the traditional Mediterranean diet, to  
41  
42 9, namely the maximal adherence.  
43  
44

45  
46 We also used the new Italian Mediterranean Index (IMI) whose score is based on the intake of 11  
47  
48 items (pasta, vegetables, fruits, legumes, olive oil, fish, soft drinks, butter, red meat, and potatoes,  
49  
50 alcohol) ranged from 0 to 11 (15). Such Italian Index was conceived to capture healthy eating in  
51  
52 the context of foods typically available in Italy.  
53  
54  
55  
56  
57  
58  
59  
60

### Data collection

Body Mass Index (BMI) was calculated as  $\text{kg/m}^2$ . Waist circumferences were measured according to the NIH, Heart, Lung, and Blood guidelines (16). Blood pressure (BP) was measured by an automatic device (OMRON-HEM-705CP) 3 times on the non-dominant arm and the average of the last 2 values was taken as the BP. Hypertension, diabetes and dyslipidemia were defined as self-reported health professional–diagnosis and anti-hypertensive, anti-diabetics or lipid-lowering medication use. Physical activity was assessed by a structured questionnaire (24 questions on working time, leisure time and sport participation) and expressed as daily energy expenditure in metabolic equivalent task-hours (MET/d).

Serum lipids and glucose were assayed by enzymatic reaction methods using an automatic analyzer (ILab 350, Instrumentation laboratory (IL), Milan, Italy). LDL-cholesterol was calculated according to Friedewald. High sensitivity C reactive protein (CRP) was measured in fresh serum, by a latex particle-enhanced immunoturbidimetric assay (IL Coagulation Systems on ACL9000). Inter- and intra-day CV were 5.5% and 4.17%, respectively.

### Socio-economic variables

Income categories were considered as low ( $< 10,000$  euro/ year, gross), low-medium ( $> 10,000 < 25,000$  euro/year), medium – high ( $> 25,000 < 40,000$  euro/year), high ( $> 40,000$  euro/ year).

Socio-economic status (SES) was expressed as a score based on 5 variables: dwelling ownership and ratio between the number of living-in family members and number of rooms (People Room Density ), both currently and at childhood - and availability of hot water at home at childhood. The five components were dichotomized according to the median value, and a score of one was attributed to the category supposed to be marker of higher social status in comparison with the opposite category: thus we assigned a score of 1 to people living in a house with living-in family members/room density  $> 0.6$  or dwelling ownership or with availability of hot water and a score 0



1  
2  
3  
4 to people with living-in family members/room density $\leq$ 0.6, no dwelling ownership or with  
5  
6 unavailability of hot water. Education Level was divided in two categories:  $\leq$ 8 years of studies (0  
7  
8 point) and  $>$ 8 years of studies (1 point).  
9

### 10 11 12 13 **Statistical analysis**

14  
15 Values for continuous variables are means  $\pm$  Standard Deviation. CRP was transformed into natural  
16  
17 logarithm to reduce positive skewness, but data were reported untransformed for clarity. Analysis of  
18  
19 variance for continuous or categorical variables was applied to test the associations in Table 1.  
20

21  
22 Multivariable analysis of variance was used for testing the association of adherence to  
23  
24 Mediterranean diet scores, dietary patterns or dietary variables (considered as the dependent  
25  
26 variables) with categories of income or SES components. By using multivariable logistic regression  
27  
28 analysis, odds ratio (ORs) with corresponding 95% confidence intervals (95% CI) were calculated  
29  
30 to quantify the association of income or education levels with adherence to Mediterranean diet-like  
31  
32 eating scores. High adherence to MD, as stated by the Medscore, was defined when the score was  
33  
34  $\geq$ 6 points whereas a low adherence when the score was  $\leq$ 3 points. Subjects with intermediate values  
35  
36 (4 or 5 points) were excluded from this analysis in order to focus on the two extreme categories of  
37  
38 adherence. The same was done for the IMI score but the cut-off was  $\geq$ 5 for the higher adherence or  
39  
40  $\leq$ 3 for the lower adherence category.  
41  
42

43  
44 The data analysis was generated using SAS/STAT software, Version 9.1.3 of the SAS System for  
45  
46 Windows©2009. SAS Institute Inc. and SAS are registered trademarks of SAS Institute Inc., Cary,  
47  
48 NC, USA.  
49

## 50 51 52 53 **RESULTS**

### 54 55 **Income groups** 56 57 58 59 60

1  
2  
3  
4 Table 1 shows the characteristics of the whole population by income categories. People in the  
5  
6 uppermost income group were 53.5% men and showed a better health profile, having significantly  
7  
8 lower values of BMI, systolic blood pressure, C-reactive protein, triglycerides, blood glucose.

9  
10 Obesity prevalence (BMI > 30 Kg/m<sup>2</sup>) differed according to income; it was higher in the lowest-  
11  
12 income group (36%) and lower in the highest- income category (20%, p <.0001 Tab. 1).

13  
14 In Table 2 the association among income levels, dietary habits and single food groups are reported.

15  
16  
17 Subjects in the lower income categories showed poor adherence to the Olive oil and Vegetables  
18  
19 dietary pattern (p<.0001) whereas a greater adherence to the Western type pattern was observed.

20  
21 Higher income groups were significantly associated with greater adherence to both score indexes,  
22  
23 namely MDS (p<.0001) and IMI (p<.0001) in the model adjusted for age, sex , daily energy intake,  
24  
25 BMI, physical activity, smoking and alcohol consumption.

26  
27  
28 In addition, analysis of single foods consumption by income categories showed that people with the  
29  
30 higher income reported higher intake of the basic components of the Mediterranean diet, that is fish,  
31  
32 fruits, legumes and reduced consumption of animal fats, processed meat, white meat whose frequent  
33  
34 consumption is more typical of a Western dietary model.

35  
36  
37 The odds of having highest adherence to the Mediterranean diet, that raised both with MDS and  
38  
39 IMI scores, clearly increased according to income levels (Tab. 4). People having the highest income  
40  
41 had 56% (MDS) or 68% (IMI) statistically significant higher probability to stick to a  
42  
43 Mediterranean diet-like eating pattern than those in the lowest income group (Tab. 4).

44  
45  
46 Regarding alcohol consumption, the highest income group resulted to include the highest  
47  
48 prevalence of moderate drinkers (41.7% versus 27.5% recorded in the lowest income group) as  
49  
50 already found in a study on a sample of Danish population (17) .

## 51 52 53 54 55 **Socio-economic status and education**

1  
2  
3  
4 People in the highest SES category showed a higher adherence to IMI ( $p = 0.0042$ ) whereas no  
5  
6 difference was found in relation to the MDS ( $p = 0.82$ ). Higher education ( $> 8$  years) was associated  
7  
8 with higher adherence as well (Tab. 3).  
9

10 Odds for association of higher education with higher adherence to MDS or IMI were 1.22 and 1.20  
11  
12 respectively ( $p < 0.0024$ ). ORs were adjusted for sex, age, energy intake, BMI, physical activity,  
13  
14 smoking, alcohol consumption (Tab. 4).  
15  
16  
17  
18  
19

### 20 **Stratification by education**

21  
22 As less educated people may show lower adherence because of lack of knowledge about healthy  
23  
24 habits (18), we performed additional analyses stratified for educational level.  
25

26 Both in higher ( $>8$  years of studies) and lower ( $\leq 8$ ) educated groups adherence to  
27  
28 Mediterranean diet (evaluated both by IMI and MDS score) followed the gradient of income  
29  
30 categories (Tab. 5).  
31  
32  
33  
34

### 35 **DISCUSSION**

36  
37 We found that people with higher income and higher levels of education have a greater adherence to  
38  
39 Mediterranean diet-like eating patterns, as measured by three different parameters: two *a priori*  
40  
41 Mediterranean scores (the traditional one introduced by Trichopoulou and a novel Italian  
42  
43 Mediterranean index), and the *a posteriori* dietary patterns derived from principal components  
44  
45 analysis. Evidence on the health benefits of the Mediterranean diet is based on several studies and  
46  
47 meta-analyses (1, 2,18). However, adherence to this healthy eating pattern is rapidly disappearing in  
48  
49 the countries of Southern Europe where it originated and persisted during centuries, including the  
50  
51 areas of Northern Africa in which there is an increasing prevalence of metabolic disorders and  
52  
53 consequent cardiovascular disease mainly due to the changing in lifestyle habits (19). Socio-  
54  
55 economic status has been included among the factors related to chronic disease onset, and  
56  
57  
58  
59  
60

1  
2  
3  
4 disparities in dietary habits by social class have been advocated to explain at least in part the higher  
5  
6 CVD risk factors profile observed among low SES groups (20).  
7

8  
9 Our results agree with what reported in the review by Darmon et al. (7) that higher-quality diets are  
10  
11 mainly consumed by better educated and more affluent people while lower socio-economic groups  
12  
13 tend to have lower quality diets thus exposing themselves to a higher risk to develop diet-related  
14  
15 diseases. Similar conclusions were reached by other investigations (21) suggesting that low socio-  
16  
17 economic groups end with having poorer diets. These findings could be supported, at least in part,  
18  
19 by the increasing prices of some of the key foods of the MD (6). Indeed researchers in Spain  
20  
21 showed that Mediterranean diet is definitely more expensive to follow than western dietary patterns  
22  
23 suggesting that this may represent a strong economic obstacle to be considered when counselling  
24  
25 people about the opportunity to follow a healthy diet because cost may become a prohibitive factor  
26  
27 (6). Aggrawal et al. (22) demonstrated that the well-known socio-economic disparities in diet  
28  
29 quality is mediated by food cost confirming that lower SES groups tend to consume more energy  
30  
31 dense and nutrient poor diets.  
32  
33

34  
35 We have also found that subjects with lower income have also a greater prevalence of obesity. The  
36  
37 association between obesity and SES has been already highlighted by previous studies (23)  
38  
39 ascribing to SES an important role in determining the risk of obesity and overweight not only in  
40  
41 adults but also in children (24). Our data suggest that the strong association observed between lower  
42  
43 income and SES levels could be partially mediated by poor adherence to healthy dietary pattern  
44  
45 recorded in the lowest socio-economic groups which reported lower values with both the  
46  
47 Mediterranean scores.  
48  
49

50  
51 It is quite clear that accumulating proofs on the benefits of Mediterranean- like diets could no  
52  
53 longer be the only task of prevention strategies which should also try to set the conditions allowing  
54  
55 people to stick to healthier dietary habits.  
56  
57  
58  
59  
60

1  
2  
3  
4 This study contributes to provide further evidence to the assumption that dietary habits are strongly  
5  
6 influenced by socio-economic status, in particular by income which appears to play an important  
7  
8 role in determining people's eating choices. For what concerns education, previous studies found a  
9  
10 relationship between higher levels of education and healthy diets (25). In our research, education  
11  
12 resulted to be independently associated to Mediterranean diet and did not modify the association  
13  
14 between income levels and healthy dietary pattern as shown in the stratified analysis by education  
15  
16 levels.  
17

18  
19 The promotion of healthy lifestyles and diets to prevent weight gain and related diseases has  
20  
21 jumped to the top of the priority list of the public health experts all over the world since obesity has  
22  
23 become a threatening epidemic. So far the traditional Mediterranean diet has proven to be an  
24  
25 effective "remedy" to the spreading of the major chronic disease, obesity and mortality. Our study  
26  
27 highlights the strong linkage among low income, poor adherence to MD and consequent obesity  
28  
29 prevalence.  
30

31  
32 We started our study wondering about what makes so hard for people to choose healthy food  
33  
34 instead of bad products, putting at risk their own health. We excluded it could be just a matter of  
35  
36 personal choice or taste, neither an issue related to the lack of knowledge about the healthy benefits  
37  
38 of MD worldwide recognized and also well disseminated in the lay press.  
39  
40  
41  
42  
43

#### 44 **Limitations of this study**

45  
46 A major limitation of the present study is that people self-reported their own income which is a  
47  
48 quite sensitive issue. Indeed we recorded a high percentage (30.7%) of non-respondent subjects  
49  
50 who refused to declare or did not know their personal income. Such large non-respondent group is  
51  
52 very common in this type of investigation, especially for women and elderly (26). However, there  
53  
54 was no difference between the whole Moli-sani population and the subsample used for the present  
55  
56 analysis in dietary habits and socio-economic variables. Moreover, we also evaluated other  
57  
58  
59  
60

1  
2  
3  
4 economic variables, less prone to reporting bias, that showed similar association with  
5  
6 Mediterranean indices and dietary patterns.  
7

8 Another inherent limit is represented by the cross-sectional nature of our study.  
9

10 In addition, caution is needed in extending the results presented here to larger contexts since data  
11 were collected in a region located between Central and Southern Italy, Mediterranean by tradition  
12 and culture (10). Yet, the main characteristics of our sample are comparable to those of the Italian  
13 Cardiovascular Epidemiological Observatory (27) a large survey including random samples of the  
14 general population all over Italy; therefore our sample could be considered representative at least of  
15 the Italian population.  
16  
17  
18  
19  
20  
21  
22  
23

#### 24 25 26 **Strengths of this study** 27

28 Our population sample is made of subjects coming from a quite homogenous environment with no  
29 marked differences in terms of socioeconomic disparities, differently from metropolitan areas,  
30 where previous studies have found huge gaps among social classes and related health status at  
31 relatively small distances from the city centre (28). Bearing this in mind, the differences we  
32 observed in the adherence to Mediterranean diet according to income indicate that also in a  
33 homogeneous environment, both for genetic and lifestyles, income and education can still play a  
34 role in influencing dietary choices. Furthermore, diet quality showed a continued improvement  
35 across a relatively small range of economic strata. Our “poorest” are represented by people earning  
36 less than 10,000 euro/gross per year whilst the “richest” group is made of subjects with more than  
37 40,000 euro/gross per year. Such differences among income classes are quite restrained and recall  
38 what already said for the pretty homogeneous environment where our sample comes from. We are  
39 not dealing with real huge differences both for socioeconomic and income issues. Despite this  
40 homogeneity, we did note notable changes in diet quality among the groups.  
41  
42  
43  
44  
45  
46  
47  
48  
49  
50  
51  
52  
53  
54  
55  
56  
57  
58  
59  
60

1  
2  
3  
4 The differences we observed across the income strata would likely become even more evident in  
5  
6 Mediterranean importing countries where getting typical Mediterranean diet products is more  
7  
8 difficult and expensive.  
9

10  
11 In addition, for the first time this topic was addressed by using two *a priori* Mediterranean scores  
12  
13 (the traditional one introduced by Trichopoulou and a novel Italian Mediterranean index), and the *a*  
14  
15 *posteriori* dietary patterns derived from principal components analysis.  
16  
17

## 18 19 20 **CONCLUSION**

21  
22 Our data clearly indicate that eating “mediterraneanly” is also, if not mainly, a matter of healthy  
23  
24 food accessibility in terms of economic costs. The increasing prices of the basic Mediterranean food  
25  
26 items seem to represent a real obstacle to healthy diet driving people to choose alternative ways of  
27  
28 eating usually inspired by the need to save money in everyday life. Public health policies shall take  
29  
30 into account the fact that correct dietary habits need to be promoted by allowing people to choose  
31  
32 the best for their own health. It is definitely an interdisciplinary issue which shall call to action  
33  
34 every single actor of modern societies otherwise condemned to increase their already heavy burden  
35  
36 of chronic diseases. As already noted by others who dealt with this topic, the promotion of high-  
37  
38 cost foods to low-income people without taking food costs into account is not likely to be successful  
39  
40  
41 (7).  
42  
43  
44  
45  
46  
47  
48  
49  
50  
51  
52  
53  
54  
55  
56  
57  
58  
59  
60

Table 1 Characteristics of the whole population and by four income categories

|                                      | Income Categories |                             |                                        |                                       |                               | P value* |
|--------------------------------------|-------------------|-----------------------------|----------------------------------------|---------------------------------------|-------------------------------|----------|
|                                      | All<br>(n=13,262) | < 10,000<br>(n = 980, 7.4%) | > 10,000 < 25,000<br>(n = 5751, 43.4%) | > 25,000 < 40,000<br>(n= 4120, 31.1%) | > 40,000<br>(n = 2411, 18.2%) |          |
| Age (years)                          | 53.3 (10.6)       | 60.1 (12.7)                 | 54.0 (11.2)                            | 51.4 (9.5)                            | 52.3 (8.8)                    | <.0001   |
| Sex (males, n, %)                    | 6590 (49.7%)      | 348 (35.5%)                 | 2834 (49.3%)                           | 2117 (51.4%)                          | 1291 (53.5%)                  | <.0001   |
| BMI (kg/m <sup>2</sup> )             | 27.7 (4.6)        | 28.7 (5.3)                  | 28.2 (4.7)                             | 27.3 (4.3)                            | 27.0 (4.0)                    | <.0001   |
| WH-ratio                             | 0.91 (0.07)       | 0.92 (0.079)                | 0.91 (0.075)                           | 0.91 (0.075)                          | 0.91 (0.074)                  | 0.019    |
| Systolic blood pressure ( mmHg)      | 139.0 (20.1)      | 143.4 (21.0)                | 140.1 (20.4)                           | 137.3 (19.6)                          | 137.4 (19.2)                  | 0.0053   |
| Diastolic blood pressure ( mmHg)     | 82.7 (9.6)        | 81.7 (9.7)                  | 82.8 (9.4)                             | 82.7 (9.7)                            | 82.8 (10.0)                   | 0.0038   |
| Total physical activity (MET-h /day) | 43.4 (8.7)        | 44.8 (10.4)                 | 45.0 (9.7)                             | 42.5 (7.9)                            | 40.4 (5.2)                    | <.0001   |
| Leisure time PA ( MET-h /day )       | 2.18 (1.88)       | 1.81 (1.67)                 | 2.10 (1.78)                            | 2.22 (1.96)                           | 2.28 (1.94)                   | 0.20     |
| Working PA ( MET-h /day )            | 14.6 (12.2)       | 22.4 (19.1)                 | 18.8 (14.3)                            | 12.7 (10.4)                           | 10.2 (6.4)                    | <.0001   |
| Smokers n, %                         |                   |                             |                                        |                                       |                               |          |
| <i>Never</i>                         | 6370 (48.1%)      | 558 (56.9%)                 | 2838 (49.4%)                           | 1901 (46.2%)                          | 1073 (44.5%)                  | <.0001   |
| <i>Current</i>                       | 3296 (25.0%)      | 222 (22.6%)                 | 1418 (24.7%)                           | 1060 (25.8%)                          | 596 (24.7%)                   |          |
| <i>Former</i>                        | 3585 (27.5%)      | 200 (20.4%)                 | 1490 (25.9%)                           | 1154 (28.0%)                          | 741 (30.7%)                   |          |
| Total cholesterol ( mg/dL)           | 212.3 (40.2)      | 214.3 (41.9)                | 212.8 (40.4)                           | 211.8 (40.4)                          | 211.0 (38.7)                  | 0.64     |
| HDL ( mg/dL)                         | 57.0 (14.5)       | 58.4 (14.4)                 | 57.2 (14.4)                            | 56.6 (14.5)                           | 56.8 (14.6)                   | 0.35     |
| LDL ( mg/dL)                         | 130.3 (33.6)      | 130.8 (35.7)                | 130.3 (33.8)                           | 130.2 (33.6)                          | 130.1 (32.7)                  | 0.65     |
| CRP ( mg/dL)                         | 2.4 (3.0)         | 3.0 (3.7)                   | 2.6 (3.1)                              | 2.2 (2.9)                             | 2.1 (2.7)                     | <.0001   |
| Triglycerides ( mg/dL)               | 127.0 (83.8)      | 129.1 (87.0)                | 129.1 (84.5)                           | 126.1 (85.0)                          | 122.6 (78.4)                  | 0.0002   |
| Blood glucose ( mg/dL)               | 96.8 (17.0)       | 97.7 (20.4)                 | 97.2 (16.8)                            | 96.4 (16.5)                           | 96.4 (16.4)                   | 0.17     |
| Obesity (n, %)                       | 3563 (26.9%)      | 352 (36.0%)                 | 1733 (30.1%)                           | 988 (24.0%)                           | 490 (20.3%)                   | <.0001   |
| Hypertension (n, %)                  | 6891 (52.0%)      | 628 (64.1%)                 | 3092 (53.9%)                           | 1978 (48.1%)                          | 1193 (49.6%)                  | 0.59     |

\* P value adjusted for sex, age and energy intake



Table 2 Mediterranean diet adherence and dietary consumption in the whole population and by four income categories

## Income categories

|                                                         | All<br>(n=13,262) | < 10,000<br>(n = 980, 7.4%) | > 10,000 < 25,000<br>(n = 5751, 43.4%) | > 25,000 < 40,000<br>(n= 4120, 31.1%) | > 40,000<br>(n = 2411, 18.2%) | P value * |
|---------------------------------------------------------|-------------------|-----------------------------|----------------------------------------|---------------------------------------|-------------------------------|-----------|
| <b>Mediterranean score (MDS)</b>                        | 4.44 (1.64)       | 4.32 (1.61)                 | 4.40 (1.62)                            | 4.46 (1.62)                           | 4.53 (1.70)                   | <.0001    |
| <b>Italian Mediterranean index (IMI)</b>                | 3.26 (1.71)       | 3.20 (1.64)                 | 3.15 (1.68)                            | 3.30 (1.71)                           | 3.49 (1.79)                   | <.0001    |
| <b>Dietary Pattern 1<br/>(Olive Oil and Vegetables)</b> | 0.042 (0.95)      | -0.066 (0.92)               | 0.021 (0.94)                           | 0.070 (0.95)                          | 0.091 (0.97)                  | <.0001    |
| <b>Dietary Pattern 2<br/>(Pasta and Meat)</b>           | 0.036 (0.95)      | 0.0078 (0.91)               | 0.093 (0.95)                           | 0.0053 (0.95)                         | - 0.036 (0.97)                | <.0001    |
| <b>Dietary Pattern 3<br/>(Eggs and sweets)</b>          | 0.015 (0.85)      | -0.13 (0.88)                | 0.040 (0.86)                           | 0.044 (0.85)                          | -0.033 (0.82)                 | <.0001    |
| <b>Energy intake (kcal/day)</b>                         | 2177.4 (640.7)    | 2062.5 (704.1)              | 2186.3 (649.0)                         | 2190.6 (627.8)                        | 2180.4 (610.7)                | 0.50      |
| <b>Alcohol intake (gr/day)</b>                          | 16.5 (22.4)       | 16.1 (25.8)                 | 18.2 (24.5)                            | 15.3 (20.3)                           | 14.9 (18.6)                   | <.0001    |
| <b>Moderate drinkers (n, %)</b>                         | 4303 (33.3%)      | 261 (27.5%)                 | 1646 (29.2%)                           | 1419 (35.3%)                          | 977 (41.7%)                   | <.0001    |
| <b>Olive oil (gr/day)</b>                               | 24.2 (9.2)        | 22.9 (9.0)                  | 24.4 (9.3)                             | 24.4 (9.2)                            | 24.0 (9.1)                    | 0.0009    |
| <b>Animal fat (gr/day)</b>                              | 1.26 (1.41)       | 1.21 (1.37)                 | 1.34 (1.45)                            | 1.25 (1.41)                           | 1.11 (1.31)                   | <.0001    |
| <b>Fish (gr/day)</b>                                    | 20.9 (17.0)       | 17.5 (15.5)                 | 19.4 (16.3)                            | 22.1 (17.4)                           | 23.9 (18.0)                   | <.0001    |
| <b>Processed meat (gr/day)</b>                          | 30.4 (20.9)       | 27.4 (20.0)                 | 31.5 (21.8)                            | 30.7 (20.5)                           | 28.6 (19.9)                   | <.0001    |
| <b>Cooked vegetables (gr/day)</b>                       | 73.5 (43.4)       | 71.2 (42.8)                 | 74.8 (44.0)                            | 74.0 (42.5)                           | 70.6 (43.4)                   | 0.0005    |
| <b>Legumes (gr/day)</b>                                 | 28.3 (22.1)       | 27.1 (20.3)                 | 27.1 (21.6)                            | 28.4 (21.9)                           | 31.3 (24.2)                   | <.0001    |
| <b>Nuts and seeds (gr/day)</b>                          | 0.89 (2.3)        | 0.90 (3.2)                  | 0.87 (2.3)                             | 0.88 (2.1)                            | 0.94 (2.2)                    | 0.71      |
| <b>Red meat (gr/day)</b>                                | 47.8 (26.0)       | 44.7 (26.3)                 | 48.8 (25.9)                            | 47.9 (25.8)                           | 46.8 (26.3)                   | 0.0087    |
| <b>White meat (gr/day)</b>                              | 26.4 (18.8)       | 29.6 (19.8)                 | 28.1 (19.3)                            | 25.3 (17.8)                           | 23.2 (18.1)                   | <.0001    |
| <b>Fruits (gr/day)</b>                                  | 358.5 (204.3)     | 362.7 (211.1)               | 354.9 (201.2)                          | 355.7 (198.9)                         | 370.3 (217.0)                 | 0.0034    |

\*P value adjusted for sex, age, energy intake, BMI, physical activity, smoking, alcohol consumption

Table 3 Characteristics of the whole population and by socio-economic status and education

|                                   | SES categories         |                               |                         | P value* | Educational levels            |                            | P value* |
|-----------------------------------|------------------------|-------------------------------|-------------------------|----------|-------------------------------|----------------------------|----------|
|                                   | Low<br>(n=4081, 31.8%) | Low-medium<br>(n=3955, 30.8%) | High<br>(n=4803, 37.4%) |          | <= 8 years<br>(n = 6098, 46%) | > 8 years<br>(n=7158, 54%) |          |
| Age (years)                       | 55.9 (10.3)            | 54.4 (10.9)                   | 50.0 (9.8)              | <.0001   | 56.1 (11.4)                   | 51.0 (9.4)                 | <.0001   |
| Sex (males, n, %)                 | 2097 (51.4%)           | 1920 (48.5%)                  | 2377 (49.5%)            | <.0001   | 2982 (48.9%)                  | 3607 (50.4%)               | <.0001   |
| BMI (kg/m <sup>2</sup> )          | 28.2 (4.6)             | 27.9 (4.5)                    | 27.1 (4.5)              | <.0001   | 28.6 (4.7)                    | 26.9 (4.3)                 | <.0001   |
| WH-ratio                          | 0.92 (0.073)           | 0.91 (0.077)                  | 0.90 (0.075)            | 0.16     | 0.92 (0.075)                  | 0.90 (0.075)               | 0.87     |
| Systolic blood pressure (mmHg)    | 141.9 (20.7)           | 139.8 (20.0)                  | 135.6 (19.0)            | 0.26     | 142.0 (20.4)                  | 136.3 (19.3)               | 0.66     |
| Diastolic blood pressure (mmHg)   | 83.1 (9.6)             | 82.7 (9.5)                    | 82.1 (9.7)              | 0.89     | 82.9 (9.5)                    | 82.4 (9.8)                 | <.0001   |
| Physical activity (MET-h/day)     | 44.1 (8.9)             | 43.5 (8.8)                    | 42.7 (8.4)              | <.0001   | 45.6 (10.3)                   | 41.5 (6.5)                 | <.0001   |
| Leisure time PA ( MET-h /day )    | 2.14 (1.81)            | 2.10 (1.79)                   | 2.22 (1.95)             | 0.80     | 2.10 (1.84)                   | 2.21 (1.90)                | 0.91     |
| Working PA ( MET-h /day )         | 16.5 (13.2)            | 15.1 (13.0)                   | 13.2 (11.0)             | <.0001   | 21.7 (15.4)                   | 11.1 (8.2)                 | <.0001   |
| Smokers n, %                      |                        |                               |                         |          |                               |                            |          |
| <i>Never</i>                      | 1880 (46.1%)           | 1961 (49.6%)                  | 2320 (48.3%)            | 0.0002   | 3047 (50.0%)                  | 3321 (46.4%)               | <.0001   |
| <i>Current</i>                    | 1049 (25.7%)           | 910 (23.0%)                   | 1227 (25.6%)            |          | 1456 (23.9%)                  | 1839 (25.7%)               |          |
| <i>Former</i>                     | 1146 (28.1%)           | 1083 (27.4%)                  | 1253 (26.1%)            |          | 1593 (26.1%)                  | 1992 (27.8%)               |          |
| Total cholesterol ( mg/dL)        | 212.4 (40.5)           | 212.7 (40.7)                  | 211.9 (39.7)            | 0.0022   | 213.9 (41.1)                  | 210.9 (39.4)               | 0.46     |
| HDL ( mg/dL)                      | 56.3 (14.1)            | 57.2 (14.5)                   | 57.5 (14.7)             | 0.0003   | 57.1 (14.4)                   | 57.0 (14.6)                | 0.33     |
| LDL ( mg/dL)                      | 130.4 (34.0)           | 130.4 (33.7)                  | 130.2 (33.4)            | 0.014    | 131.0 (34.6)                  | 129.6 (32.8)               | 0.13     |
| CRP ( mg/dL)                      | 2.6 (3.1)              | 2.4 (2.9)                     | 2.2 (3.0)               | 0.079    | 2.7 (3.2)                     | 2.2 (2.8)                  | 0.13     |
| Triglycerides ( mg/dL)            | 131.0 (87.9)           | 127.5 (83.2)                  | 122.8 (80.9)            | 0.50     | 131.6 (87.2)                  | 123.0 (80.6)               | 0.16     |
| Blood glucose ( mg/dL)            | 98.4 (18.4)            | 96.9 (17.2)                   | 95.5 (14.8)             | 0.013    | 98.0 (17.5)                   | 95.9 (16.4)                | 0.84     |
| Obesity (n, %)                    | 1215 (31.8%)           | 1122 (30.8%)                  | 1112 (23.1%)            | <.0001   | 2038 (33.4%)                  | 1523 (21.3%)               | <.0001   |
| Hypertension (n, %)               | 2392 (58.7%)           | 2141 (54.2%)                  | 2114 (44.1%)            | 0.85     | 3600 (59.1%)                  | 3289 (46.0%)               | 0.97     |
| Mediterranean score (MDS)         | 4.51 (1.61)            | 4.45 (1.64)                   | 4.38 (1.65)             | 0.82     | 4.43 (1.62)                   | 4.45 (1.65)                | <.0001   |
| Italian Mediterranean index (IMI) | 3.23 (1.70)            | 3.25 (1.70)                   | 3.30 (1.73)             | 0.0042   | 3.18 (1.67)                   | 3.33 (1.74)                | <.0001   |

\*P value adjusted for sex, age, energy intake, BMI, physical activity, smoking, alcohol consumption

**Table 4 Odds ratios of having high adherence to Mediterranean diet according to income and education**

|                        | Mediterranean score |                  |      |             | Italian Mediterranean Index |                  |      |             |
|------------------------|---------------------|------------------|------|-------------|-----------------------------|------------------|------|-------------|
|                        | Low<br>(n=3843)     | High<br>(n=3518) | OR   | (95%CI)     | Low<br>(n=4704)             | High<br>(n=3089) | OR   | (95%CI)     |
| <b>Income</b>          |                     |                  |      |             |                             |                  |      |             |
| < 10,000               | 310 (8.1%)          | 231 (6.6%)       | -1-  | (referent)  | 353 (7.5%)                  | 209 (6.8%)       | -1-  | (referent)  |
| > 10,000 < 25,000      | 1694 (44.1%)        | 1470 (41.8%)     | 1.32 | (1.08-1.61) | 2161 (45.9%)                | 1201 (38.9%)     | 1.06 | (0.86-1.30) |
| > 25,000 < 40,000      | 1153 (30.0%)        | 1116 (31.7%)     | 1.57 | (1.27-1.93) | 1436 (30.5%)                | 995 (32.2%)      | 1.31 | (1.05-1.62) |
| > 40,000               | 686 (17.9%)         | 701 (19.9%)      | 1.56 | (1.24-1.96) | 754 (16.0%)                 | 684 (22.1%)      | 1.68 | (1.33-2.12) |
| <b>Education level</b> |                     |                  |      |             |                             |                  |      |             |
| Low                    | 1775 (46.2%)        | 1571 (44.7%)     | -1-  | (referent)  | 2250 (47.8%)                | 1307 (42.3%)     | -1-  | (referent)  |
| High                   | 2068 (53.8%)        | 1946 (55.3%)     | 1.22 | (1.09-1.37) | 2452 (52.2%)                | 1782 (57.7%)     | 1.20 | (1.07-1.35) |

The logistic model included income and education categories and sex, age, energy intake, BMI, physical activity, smoking, alcohol consumption

**Table 5 Mediterranean diet adherence according to four income levels and stratified by education**

|                                       | Income Categories |                   |                   |             | P value * |
|---------------------------------------|-------------------|-------------------|-------------------|-------------|-----------|
|                                       | < 10,000          | > 10,000 < 25,000 | > 25,000 < 40,000 | > 40,000    |           |
| <b>Higher Education</b><br>(n = 7158) | (n=150)           | (n=2004)          | (n=2860)          | (n=2144)    |           |
| Mediterranean Diet                    | 4.29 (1.70)       | 4.35 (1.60)       | 4.47 (1.62)       | 4.53 (1.71) | 0.0065    |
| Italian Mediterranean Index           | 3.26 (1.78)       | 3.18 (1.69)       | 3.33 (1.72)       | 3.49 (1.79) | <.0001    |
| <b>Lower Education</b><br>(n = 6101)  | (n = 829)         | (n = 3745)        | (n = 1260)        | (n = 267)   |           |
| Mediterranean Diet                    | 4.33 (1.60)       | 4.43 (1.64)       | 4.44 (1.60)       | 4.60 (1.64) | 0.0094    |
| Italian Mediterranean Index           | 3.19 (1.61)       | 3.13 (1.67)       | 3.22 (1.69)       | 3.54 (1.73) | 0.0003    |

\*p value adjusted for sex, age, total energy intake, BMI, physical activity, smoking, alcohol consumption

## REFERENCES

1. Sofi F, Abbate R, Gensini GF, et al. Accruing evidence on benefits of adherence to the Mediterranean diet on health: an updated systematic review and meta-analysis. *Am J Clin Nutr*. 2010;92:1189-96.
2. Bonaccio M, Iacoviello L, de Gaetano G, et al. The Mediterranean diet: The reasons for a success. *Thromb Res*. 2012 ;129:401-4
3. <http://www.unesco.org/culture/ich/en/RL/00394>
4. Keys A. Seven countries. A multivariate analysis of death, coronary heart disease. Cambridge MA: Harvard University Press; 1980.
5. Prentice AM. The emerging epidemic of obesity in developing countries. *Int J Epidemiol*. 2006;35:93-9
6. Lopez CN, Martinez-Gonzalez MA, Sanchez-Villegas A, et al. Costs of Mediterranean and western dietary patterns in a Spanish cohort and their relationship with prospective weight change. *J Epidemiol Community Health*. 2009;63:920-7
7. Darmon N, Drewnowski A. Does social class predict diet quality? *Am J Clin Nutr*. 2008;87:1107-17
8. Esposito K, Kastorini CM, Panagiotakos DB, et al. Mediterranean diet and weight loss: meta-analysis of randomized controlled trials. *Metab Syndr Relat Disord*. 2011;9:1-12.
9. Schröder H, Marrugat J, Covas MI. High monetary costs of dietary patterns associated with lower body mass index: a population-based study. *Int J Obes (Lond)*. 2006;30:1574-9.
10. Iacoviello L, Bonanni A, Costanzo S, et al. The Moli-sani Project, a randomized, prospective cohort study in the Molise region in Italy; design, rationale and objectives. *Italian J Public Health* 2007; 4: 110-8

- 1  
2  
3  
4 11. Pala V, Sieri S, Palli D, et al. Diet in the Italian EPIC cohorts: presentation of data and  
5  
6 methodological issues. *Tumori*. 2003;89:594-607  
7
- 8  
9 12. Pisani P, Faggiano F, Krogh V, et al. Relative validity and reproducibility of a food  
10  
11 frequency dietary questionnaire for use in the Italian EPIC centres. *Int J Epidemiol*. 1997;26  
12  
13 (Suppl. 1): S152-60  
14
- 15 13. Centritto F, Iacoviello L, di Giuseppe R, et al. Dietary patterns, cardiovascular risk factors  
16  
17 and C-reactive protein in a healthy Italian population. *Nutr Metab Cardiovasc Dis*.  
18  
19 2009;19:697-706  
20
- 21 14. Trichopoulou A, Orfanos P, Norat T, et al. Modified Mediterranean diet and survival: EPIC-  
22  
23 elderly prospective cohort study. *BMJ*. 2005;330 (7498);991.  
24  
25
- 26 15. Agnoli C, Krogh V, Grioni S, et al. A priori-defined dietary patterns are associated with  
27  
28 reduced risk of stroke in a large Italian cohort. *J Nutr*. 2011;141:1552-8  
29
- 30 16. Janssen I, Katzmarzyk PT, Ross R. Body mass index, waist circumference, and health risk:  
31  
32 evidence in support of current National Institutes of Health guidelines. *Arch Intern Med*  
33  
34 2002;162:2074–2079  
35  
36
- 37 17. Nielsen NR, Schnohr P, Jensen G, et al. Is the relationship between type of alcohol and  
38  
39 mortality influenced by socio-economic status? *J Intern Med*. 2004;255:280-8.  
40
- 41 18. Sofi F, Cesari F, Abbate R, et al. Adherence to Mediterranean diet and health status: meta-  
42  
43 analysis. *BMJ*. 2008;337: a1344.  
44  
45
- 46 19. Mehio Sibai A, Nasreddine L, Mokdad AH, et al. Nutrition transition and cardiovascular  
47  
48 disease risk factors in Middle East and North Africa countries: reviewing the evidence. *Ann*  
49  
50 *Nutr Metab*. 2010;57:193-203.  
51  
52
- 53 20. Panagiotakos DB, Pitsavos C, Chrysohoou C, et al. Dietary habits mediate the relationship  
54  
55 between socio-economic status and CVD factors among healthy adults: the ATTICA study.  
56  
57 *Public Health Nutr*. 2008;11:1342-9  
58  
59  
60

- 1  
2  
3  
4 21. Shahar D, Shai I, Vardi H, et al. Diet and eating habits in high and low socioeconomic  
5  
6 groups. *Nutrition*. 2005;21:559-66  
7
- 8  
9 22. Aggarwal A, P Monsivais P, Cook AJ et al. Does diet cost mediate the relation between  
10  
11 socioeconomic position and diet quality? *European Journal of Clinical Nutrition* 2011;  
12  
13 65:1059-1066  
14
- 15 23. Vernay M, Malon A, Oleko A, et al. Association of socioeconomic status with overall  
16  
17 overweight and central obesity in men and women: the French Nutrition and Health Survey  
18  
19 2006. *BMC Public Health*. 2009;9:215.  
20  
21
- 22 24. Shrewsbury V, Wardle J. Socioeconomic status and adiposity in childhood: A systematic  
23  
24 review of cross-sectional studies 1990–2005. *Obesity* 2008;16:275–284  
25
- 26 25. Groth MV, Fagt S, Brøndsted L. Social determinants of dietary habits in Denmark., *Eur J*  
27  
28 *Clin Nutr*. 2001;55:959-66.  
29
- 30 26. Kaplan GA, Keil JE. Socioeconomic factors and cardiovascular disease: a review of the  
31  
32 literature. *Circulation*. 1993;88:1973-98.  
33  
34
- 35 27. Giampaoli S, Rielli R, Dematté L, et al. The Italian observatory of cardiovascular risk: the  
36  
37 CUORE project experience [abstract]. *Circulation*. 2009;119:139.  
38  
39
- 40 28. Diez-Roux AV, Nieto FJ, Caulfield L, et al. Neighbourhood differences in diet: the  
41  
42 Atherosclerosis Risk in Communities (ARIC) Study. *J Epidemiol Community Health*.  
43  
44 1999;53: 55–63.  
45  
46  
47  
48  
49  
50  
51  
52  
53  
54  
55  
56  
57  
58  
59  
60

1  
2  
3  
4 **CONTRIBUTORS:** (MB, AB, LI designed the research; FDL, MB, managed data collection; MB,  
5  
6 ADC analyzed the data; MB, AB wrote the paper, MBD, GdG, LI originally inspired the research,  
7  
8 obtained the financial support and critically reviewed the manuscript). All Authors had full access  
9  
10 to all of the data in the study and take responsibility for the integrity of the data and the accuracy of  
11  
12 the data analysis. None of the Authors had a personal or financial conflict of interest.  
13  
14

### 15 16 17 **FUNDING**

18  
19 The enrolment phase of the Moli-sani Project was supported by research grants from Pfizer  
20  
21 Foundation (Rome, Italy) and the Italian Ministry of University and Research (MIUR, Rome,  
22  
23 Italy)–Programma Triennale di Ricerca, Decreto no.1588. Pfizer Foundation and MIUR had no role  
24  
25 in study design, collection, analysis, and interpretation of data; in the writing of the report; and in  
26  
27 the decision to submit the article for publication.  
28  
29

30 All Authors are independent from funders.  
31  
32

### 33 34 35 **COMPETING INTEREST**

36  
37 None  
38  
39

40  
41  
42 **ETHICAL ISSUES:** The Moli-sani study was approved by the Ethics Committee of the Catholic  
43  
44 University of Rome. Participants signed the informed consent before taking part in the study.  
45  
46

47  
48 **DATA SHARING:** no additional data available.  
49  
50  
51  
52  
53  
54  
55  
56  
57  
58  
59  
60



## APPENDIX 1

### **Moli-sani project Investigators**

**Chairperson:** Licia Iacoviello (Campobasso, Italy)

**Steering Committee:** Maria Benedetta Donati and Giovanni de Gaetano (Campobasso, Italy)  
(Chairpersons), Simona Giampaoli (Roma, Italy)

**Safety and data monitoring Committee:** Jos Vermeylen (Leuven, Belgio), Chairman, Ignacio De Paula Carrasco (Roma, Italy), Enrico Garaci (Roma, Italy)

**Event adjudicating Committee:** Deodato Assanelli (Brescia, Italy), Francesco Alessandrini (Campobasso, Italy), Vincenzo Centritto (Campobasso, Italy), Paola Muti (Roma, Italy), Holger Schünemann (Hamilton, Canada), Pasquale Spagnuolo (Termoli, Italy), Dante Staniscia (Termoli, Italy), Sergio Storti (Campobasso, Italy)

**Scientific and organizing secretariat:** Francesco Zito (Coordinator, Campobasso and Termoli, Italy), Americo Bonanni, Chiara Cerletti, Amalia De Curtis, Augusto Di Castelnuovo, Licia Iacoviello, Antonio Mascioli and Marco Olivieri (Campobasso, Italy).

**Data management and analysis (Campobasso, Italy):** Augusto Di Castelnuovo (Coordinator), Antonella Arcari, Floriana Centritto (till December 2008), Simona Costanzo, Romina di Giuseppe, Francesco Gianfagna.

**Informatics (Campobasso, Italy) :** Marco Olivieri (Coordinator), Maurizio Giacci, Antonella Padulo (till September 2008), Dario Petrarroia (till September 2007)

**Biobank and biochemical analyses (Campobasso and Termoli, Italy):** Amalia De Curtis (Coordinator), Sara Magnacca, Federico Marracino (till June 2009), Maria Spinelli, Christian Silvestri (till December 2007), Cristina Vallese (till September 2008);

**Genetics (Campobasso, Italy):** Daniela Cugino, Monica de Gaetano (till October 2008), Mirella Graziano, Iolanda Santimone, Maria Carmela Latella (till December 2008), Gianni Quacquareccio (till December 2007);

1  
2  
3  
4 **Communication** (Campobasso, Italy): Americo Bonanni (Coordinator), Marialaura Bonaccio,  
5  
6 Francesca De Lucia  
7

8 **Moli-family Project** (Campobasso, Italy): Branislav Vohnout (Coordinator) (till December 2008),  
9  
10 Francesco Gianfagna, Andrea Havranova (till July 2008), Antonella Cutrone (till October 2007);  
11

12 **Recruitment staff** (Campobasso and Termoli, Italy): Franco Zito (General Coordinator),  
13

14  
15 *Secretariat*: Mariarosaria Persichillo (Coordinator), Angelita Verna, Maura Di Lillo (till March  
16  
17 2009), Irene Di Stefano (till March 2008), *Blood sample*: Agostino Pannichella, Antonio Rinaldo  
18  
19 Vizzarri, Branislav Vohnout (till December 2008), Agnieszka Pampuch (till August 2007);  
20

21  
22 *Spirometry*: Antonella Arcari (Coordinator), Daniela Barbato (till July 2009), Francesca Bracone,  
23  
24 Simona Costanzo, Carmine Di Giorgio (till September 2008), Sara Magnacca, Simona Panebianco  
25  
26 (till December 2008), Antonello Chiovitti (till March 2008), Federico Marracino (till December  
27  
28 2007), Sergio Caccamo (till August 2006), Vanesa Caruso (till May 2006); *Electrocardiogram*:  
29

30  
31 Livia Rago (Coordinator), Daniela Cugino, Francesco Zito, Alessandra Ferri (till October 2008),  
32  
33 Concetta Castaldi (till September 2008), Marcella Mignogna (till September 2008); Tomasz Guszcz  
34  
35 (till January 2007), *Questionnaires*: Romina di Giuseppe, (Coordinator), Paola Barisciano, Lorena  
36  
37 Buonaccorsi, Floriana Centritto (till December 2008), Francesca De Lucia, Francesca Fanelli (till  
38  
39 January 2009), Iolanda Santimone, Anna Sciarretta, Maura Di Lillo (till March 2009), Isabella  
40  
41 Sorella (till September 2008), Irene Di Stefano (till March 2008), Emanuela Plescia (till December  
42  
43 2007), Alessandra Molinaro (till December 2006), Christiana Cavone (till September 2005);  
44  
45

46 **Call Center**(Campobasso, Italy): Giovanna Galuppo (till June 2009), Maura Di Lillo (till March  
47  
48 2009), Concetta Castaldi (till September 2008), Dolores D'Angelo (till May 2008), Rosanna  
49  
50 Ramacciato (till May 2008).  
51  
52  
53  
54  
55  
56  
57  
58  
59  
60

**APPENDIX 2** Food grouping used in the dietary pattern analyses

| <b>Foods or food groups</b> | <b>Food items</b>                                                                                                                                                              |
|-----------------------------|--------------------------------------------------------------------------------------------------------------------------------------------------------------------------------|
| Potatoes                    | Potatoes                                                                                                                                                                       |
| Cooked vegetables           | Leafy vegetables, root vegetables, cabbages, onion, carrots, mushrooms, egg plants, artichokes, sweet peppers, spinach, pumpkins, canned vegetables in oil, pickled vegetables |
| Raw vegetables              | Raw leafy vegetables, raw tomatoes                                                                                                                                             |
| Tomatoes (cooked)           | Tomato sauces, tomatoes                                                                                                                                                        |
| Legumes                     | Beans, lentils, peas, chick peas                                                                                                                                               |
| Fruit                       | Apples, pears, kiwi, bananas, grapes, peaches, apricots, oranges, tangerines, plums, strawberries, melon, khaki, figs, cherries                                                |
| Nuts and dried fruit        | Peanuts, almonds, hazelnuts, walnuts, dried figs, dried dates, prune                                                                                                           |
| Olives                      | Olives                                                                                                                                                                         |
| Milk                        | Milk                                                                                                                                                                           |
| Yogurt                      | Yogurt                                                                                                                                                                         |
| Fresh cheese                | Mozzarella, ricotta cheese, taleggio cheese, gorgonzola cheese, melted cheese slices, other soft cream cheese                                                                  |
| Seasoned cheese             | Fontina cheese, emmenthal, gruyere, parmesan, caciocavallo cheese, other seasoned cheese                                                                                       |
| Pasta and other grains      | Pasta, yellow maize meal                                                                                                                                                       |
| Rice                        | Rice                                                                                                                                                                           |
| Bread                       | White bread, bread with oil and other bread                                                                                                                                    |
| Crisp bread, rusks          | Breads sticks, crisp bread                                                                                                                                                     |
| Breakfast cereals           | Breakfast cereals                                                                                                                                                              |
| Salty biscuits              | Crackers                                                                                                                                                                       |
| Red meat                    | Beef, pork, lamb, horse, game, veal, other meats                                                                                                                               |
| White meat                  | Chicken, turkey, rabbit                                                                                                                                                        |
| Processed meat              | Sausages, ham, bologna sausage, dried beef, salami                                                                                                                             |

|    |                 |                                                              |
|----|-----------------|--------------------------------------------------------------|
| 1  |                 |                                                              |
| 2  |                 |                                                              |
| 3  |                 |                                                              |
| 4  | Offals          | Liver, offals                                                |
| 5  |                 |                                                              |
| 6  | Canned fish     | Canned tuna fish and other fish                              |
| 7  |                 |                                                              |
| 8  | Crustaceans,    |                                                              |
| 9  | molluscs        | Crustaceans, molluscs                                        |
| 10 |                 |                                                              |
| 11 | Fish            | Other fish                                                   |
| 12 |                 |                                                              |
| 13 | Egg             | Eggs                                                         |
| 14 |                 |                                                              |
| 15 | Vegetables oils | Seed oils (except olive oils)                                |
| 16 |                 |                                                              |
| 17 | Olive oil       | Olive oil                                                    |
| 18 |                 |                                                              |
| 19 | Butter          | Butter                                                       |
| 20 |                 |                                                              |
| 21 | Margarines      | Margarines                                                   |
| 22 |                 |                                                              |
| 23 | Animal fats     | Visible fat from meat, poultry skin, fat from ham            |
| 24 |                 |                                                              |
| 25 | Sugar & sweets  | Sugar, honey, cakes, ice cream, confections, pastry, pudding |
| 26 |                 |                                                              |
| 27 | Fruit juices    | Orange juice, grapefruit juices, other fruit juices          |
| 28 |                 |                                                              |
| 29 | Soft drinks     | Soft drinks                                                  |
| 30 |                 |                                                              |
| 31 | Coffee          | Coffee                                                       |
| 32 |                 |                                                              |
| 33 | Tea             | Tea                                                          |
| 34 |                 |                                                              |
| 35 | Other sauces    | Dressing sauces for pasta other than tomato sauce            |
| 36 |                 |                                                              |
| 37 | Mayonnaises     | Mayonnaises                                                  |
| 38 |                 |                                                              |
| 39 | Soups           | Vegetable soups                                              |
| 40 |                 |                                                              |
| 41 | Bouillon        | Meat and stock-cube broth                                    |
| 42 |                 |                                                              |
| 43 | Snacks          | Vegetable quiche                                             |
| 44 |                 |                                                              |
| 45 | Pizza           | Pizza                                                        |
| 46 |                 |                                                              |
| 47 | Wine            | Red wine, rosé wine, white wine                              |
| 48 |                 |                                                              |
| 49 | Spirits         | Alcoholic beverages other than wine or beer                  |
| 50 |                 |                                                              |
| 51 | Beer            | Beer                                                         |

---

STROBE Statement—Checklist of items that should be included in reports of *cross-sectional studies*

|                              | Item No | Recommendation                                                                                                                                                                                    |
|------------------------------|---------|---------------------------------------------------------------------------------------------------------------------------------------------------------------------------------------------------|
| <b>Title and abstract</b>    | 1       | (a) Indicate the study's design with a commonly used term in the title or the abstract                                                                                                            |
| <b>Yes</b>                   |         | (b) Provide in the abstract an informative and balanced summary of what was done and what was found                                                                                               |
| <b>Introduction</b>          |         |                                                                                                                                                                                                   |
| Background/rationale         | 2       | Explain the scientific background and rationale for the investigation being reported                                                                                                              |
| <b>Yes</b>                   |         |                                                                                                                                                                                                   |
| Objectives                   | 3       | State specific objectives, including any prespecified hypotheses                                                                                                                                  |
| <b>Yes</b>                   |         |                                                                                                                                                                                                   |
| <b>Methods</b>               |         |                                                                                                                                                                                                   |
| Study design                 | 4       | Present key elements of study design early in the paper                                                                                                                                           |
| <b>Yes</b>                   |         |                                                                                                                                                                                                   |
| Setting                      | 5       | Describe the setting, locations, and relevant dates, including periods of recruitment, exposure, follow-up, and data collection                                                                   |
| <b>Ref 10 and 13</b>         |         |                                                                                                                                                                                                   |
| Participants                 | 6       | (a) Give the eligibility criteria, and the sources and methods of selection of participants                                                                                                       |
| <b>Yes</b>                   |         |                                                                                                                                                                                                   |
| Variables                    | 7       | Clearly define all outcomes, exposures, predictors, potential confounders, and effect modifiers. Give diagnostic criteria, if applicable                                                          |
| <b>Yes</b>                   |         |                                                                                                                                                                                                   |
| Data sources/<br>measurement | 8*      | For each variable of interest, give sources of data and details of methods of assessment (measurement). Describe comparability of assessment methods if there is more than one group              |
| <b>Yes</b>                   |         |                                                                                                                                                                                                   |
| Bias                         | 9       | Describe any efforts to address potential sources of bias                                                                                                                                         |
| <b>Yes</b>                   |         |                                                                                                                                                                                                   |
| Study size                   | 10      | Explain how the study size was arrived at                                                                                                                                                         |
| <b>Ref 10</b>                |         |                                                                                                                                                                                                   |
| Quantitative variables       | 11      | Explain how quantitative variables were handled in the analyses. If applicable, describe which groupings were chosen and why                                                                      |
| <b>Yes</b>                   |         |                                                                                                                                                                                                   |
| Statistical methods          | 12      | (a) Describe all statistical methods, including those used to control for confounding                                                                                                             |
| <b>Yes</b>                   |         | (b) Describe any methods used to examine subgroups and interactions                                                                                                                               |
|                              |         | (c) Explain how missing data were addressed                                                                                                                                                       |
|                              |         | (d) If applicable, describe analytical methods taking account of sampling strategy                                                                                                                |
|                              |         | (e) Describe any sensitivity analyses                                                                                                                                                             |
| <b>Results</b>               |         |                                                                                                                                                                                                   |
| Participants                 | 13*     | (a) Report numbers of individuals at each stage of study—eg numbers potentially eligible, examined for eligibility, confirmed eligible, included in the study, completing follow-up, and analysed |
| <b>Yes</b>                   |         | (b) Give reasons for non-participation at each stage                                                                                                                                              |
|                              |         | (c) Consider use of a flow diagram                                                                                                                                                                |
| Descriptive data             | 14*     | (a) Give characteristics of study participants (eg demographic, clinical, social) and information on exposures and potential confounders                                                          |
| <b>Yes</b>                   |         | (b) Indicate number of participants with missing data for each variable of interest                                                                                                               |
| Outcome data                 | 15*     | Report numbers of outcome events or summary measures                                                                                                                                              |
| <b>Not applicable</b>        |         |                                                                                                                                                                                                   |
| Main results                 | 16      | (a) Give unadjusted estimates and, if applicable, confounder-adjusted estimates and their precision (eg, 95% confidence interval). Make clear which confounders were                              |
| <b>Yes</b>                   |         |                                                                                                                                                                                                   |

|                          |    |                                                                                                                                                                            |
|--------------------------|----|----------------------------------------------------------------------------------------------------------------------------------------------------------------------------|
|                          |    | adjusted for and why they were included                                                                                                                                    |
|                          |    | (b) Report category boundaries when continuous variables were categorized                                                                                                  |
|                          |    | (c) If relevant, consider translating estimates of relative risk into absolute risk for a meaningful time period                                                           |
| Other analyses           | 17 | Report other analyses done—eg analyses of subgroups and interactions, and sensitivity analyses                                                                             |
| <b>Yes</b>               |    |                                                                                                                                                                            |
| <b>Discussion</b>        |    |                                                                                                                                                                            |
| Key results              | 18 | Summarise key results with reference to study objectives                                                                                                                   |
| <b>Yes</b>               |    |                                                                                                                                                                            |
| Limitations              | 19 | Discuss limitations of the study, taking into account sources of potential bias or imprecision. Discuss both direction and magnitude of any potential bias                 |
| <b>Yes</b>               |    |                                                                                                                                                                            |
| Interpretation           | 20 | Give a cautious overall interpretation of results considering objectives, limitations, multiplicity of analyses, results from similar studies, and other relevant evidence |
| <b>Yes</b>               |    |                                                                                                                                                                            |
| Generalisability         | 21 | Discuss the generalisability (external validity) of the study results                                                                                                      |
| <b>Yes</b>               |    |                                                                                                                                                                            |
| <b>Other information</b> |    |                                                                                                                                                                            |
| Funding                  | 22 | Give the source of funding and the role of the funders for the present study and, if applicable, for the original study on which the present article is based              |
| <b>Yes</b>               |    |                                                                                                                                                                            |

\*Give information separately for exposed and unexposed groups.

**Note:** An Explanation and Elaboration article discusses each checklist item and gives methodological background and published examples of transparent reporting. The STROBE checklist is best used in conjunction with this article (freely available on the Web sites of PLoS Medicine at <http://www.plosmedicine.org/>, Annals of Internal Medicine at <http://www.annals.org/>, and Epidemiology at <http://www.epidem.com/>). Information on the STROBE Initiative is available at [www.strobe-statement.org](http://www.strobe-statement.org).



**Low income is associated with poor adherence to Mediterranean Diet and higher prevalence of obesity: cross-sectional results from the Moli-sani study**

|                                    |                                                                                                                                                                                                                                                                                                                                                                                                                                                                                                                                                                |
|------------------------------------|----------------------------------------------------------------------------------------------------------------------------------------------------------------------------------------------------------------------------------------------------------------------------------------------------------------------------------------------------------------------------------------------------------------------------------------------------------------------------------------------------------------------------------------------------------------|
| Journal:                           | <i>BMJ Open</i>                                                                                                                                                                                                                                                                                                                                                                                                                                                                                                                                                |
| Manuscript ID:                     | bmjopen-2012-001685.R1                                                                                                                                                                                                                                                                                                                                                                                                                                                                                                                                         |
| Article Type:                      | Research                                                                                                                                                                                                                                                                                                                                                                                                                                                                                                                                                       |
| Date Submitted by the Author:      | 06-Sep-2012                                                                                                                                                                                                                                                                                                                                                                                                                                                                                                                                                    |
| Complete List of Authors:          | Bonaccio, Marialaura; Fondazione Giovanni Paolo II, Research Laboratories<br>Bonanni, Americo; Fondazione Giovanni Paolo II, Research Laboratories<br>Di Castelnuovo, Augusto; Fondazione Giovanni Paolo II, Research<br>Laboratories<br>De Lucia, Francesca; Fondazione Giovanni Paolo II, Research Laboratories<br>Donati, Maria Benedetta; Fondazione Giovanni Paolo II, Research<br>Laboratories<br>de Gaetano, Giovanni; Fondazione Giovanni Paolo II, Research<br>Laboratories<br>Iacoviello, Licia; Fondazione Giovanni Paolo II, Research Laboratories |
| <b>Primary Subject<br>Heading</b>: | Epidemiology                                                                                                                                                                                                                                                                                                                                                                                                                                                                                                                                                   |
| Secondary Subject Heading:         | Nutrition and metabolism, Public health, Health economics                                                                                                                                                                                                                                                                                                                                                                                                                                                                                                      |
| Keywords:                          | EPIDEMIOLOGY, NUTRITION & DIETETICS, PUBLIC HEALTH, HEALTH<br>ECONOMICS                                                                                                                                                                                                                                                                                                                                                                                                                                                                                        |
|                                    |                                                                                                                                                                                                                                                                                                                                                                                                                                                                                                                                                                |

SCHOLARONE™  
Manuscripts

1  
2  
3  
4 **Low income is associated with poor adherence to Mediterranean Diet and higher prevalence**  
5  
6 **of obesity: cross-sectional results from the Moli-sani study**  
7  
8  
9

10 Marialaura Bonaccio, research fellow\*§, Americo Bonanni, research fellow \*, Augusto Di  
11 Castelnuovo, postdoctoral researcher\*\*, Francesca De Lucia, postdoctoral researcher\*, Maria  
12 Benedetta Donati, scientific coordinator\*\*\*§, Giovanni de Gaetano, head of department\*\*\*§ and  
13 Licia Iacoviello, head of laboratory\*\*§ on behalf of the Moli-sani Project Investigators°  
14  
15  
16  
17  
18  
19  
20

21 \*Science Communication Unit, \*\*Laboratory of Genetic and Environmental Epidemiology,  
22  
23

24 \*\*\*Research Laboratories, Fondazione di Ricerca e Cura “Giovanni Paolo II”, Largo Gemelli, 1  
25  
26 86100 Campobasso and §Epicomed Research, 86100 Campobasso, Italy  
27

28 °MOLI-SANI Project Investigators are listed in the Appendix 1 (Web only file)  
29  
30  
31  
32

33 **Keywords:** Obesity; Diet, Mediterranean; Social Class; Public Health; Cardiovascular Diseases  
34

35 **Word count:** 3,770  
36  
37  
38  
39

40 **Corresponding Author:**

41 Licia Iacoviello  
42 Laboratori di Ricerca  
43 Fondazione di Ricerca e Cura “Giovanni Paolo II”  
44 Largo Gemelli, 1  
45 86100 CAMPOBASSO, Italy  
46 Phone: +39 0874 312 274  
47 Fax: +39 0874 312 710  
48 E-mail: [licia.iacoviello@moli-sani.org](mailto:licia.iacoviello@moli-sani.org)  
49  
50  
51  
52  
53  
54  
55  
56  
57  
58  
59  
60



## ABSTRACT

**Objectives:** To examine cross-sectional associations of socio-economic status (i.e., income and education) with adherence to a Mediterranean dietary pattern and obesity prevalence.

**Design:** Cross-sectional study on a sample of Italian subjects enrolled in the Moli-sani Project, a population-based cohort study.

The Italian EPIC food frequency questionnaire was used to determine food intake. Adherence to Mediterranean diet (MD) was appraised according to both the Mediterranean score elaborated by Trichopoulou (MDS) and the novel Italian Mediterranean Index (IMI) and to the *a posteriori* scores derived from principal component analysis. Four income categories were identified.

**Setting:** Molise region, Italy

**Participants:** 13,262 subjects (mean age 53±11, 50% men) out of 24,318 citizens (age ≥35) randomly enrolled in the Moli-sani Project.

**Main outcomes:** Dietary patterns and risk factors for cardiovascular disease.

**Results:** Household higher income were significantly associated with greater adherence to MD ( $p<.0001$ ) and to Olive oil and Vegetables dietary pattern in multivariable model including age, sex, daily energy intake, BMI, physical activity, smoking, alcohol consumption, education and marital status. The odds of having highest adherence to MD clearly increased according to income levels. People having the highest income had 54% (95% CI: 21% to 97%, MDS) or 72% (95% CI: 34% to 121%, IMI) higher probability to stick to a Mediterranean diet-like eating pattern than those in the lowest income group. Obesity prevalence was higher in the lowest-income group (36%) in comparison with the highest- income category (20%,  $p <.0001$ ). Income was associated with dietary patterns in all categories of education.

**Conclusions:** Higher income and education are independently associated with greater adherence to Mediterranean diet-like eating patterns and lower prevalence of obesity.

## INTRODUCTION

Mediterranean Diet (MD) has been shown to offer protection against cardiovascular disease, some types of cancer, and neurodegenerative diseases in observational epidemiological studies (1). The Lyon Diet Heart Study, by a randomised dietary intervention, also showed the health benefit of MD in secondary prevention (2,3). The main food components of the MD are vegetables, fruits, cereals, fish, olive oil as main fat source and moderate red wine consumption. Recently the UNESCO committee inscribed it on the list of Intangible Heritage (4).

Despite the widely proven benefits of the diet discovered by Ancel Keys (5) in the Fifties, the Southern European countries in which Mediterranean diet originated are rapidly withdrawing from this eating pattern orienting their food choices toward products typical of the Western diet (WD) which is rich in refined grains, saturated fats, sugars, red and processed meat (6). The reasons why people keep on drifting from one dietary regimen to another remain open to several hypotheses (7). Social changes appear to have contributed to radical reversal in dietary habits in Western and Southern Europe societies although developing countries are slightly turning into westernized diets as well (8).

The cost of MD seem to have led people to give up this eating pattern in favour of less expensive products which allow to save money but are definitively unhealthy (9).

Many studies suggest that diet quality follows a socio-economic gradient highlighting how disadvantaged people present higher rates of obesity, diabetes, cardiovascular disease and some types of cancer (10).

The abandon of MD is also considered as a possible cause of the increasing obesity pandemic (11). Several studies made a further step forward in order to see whether there is an association between diet cost and obesity, finding out that higher adherence to healthy dietary patterns is linked to higher monetary costs and is inversely associated with BMI and obesity (12).

1  
2  
3  
4 The aim of the present study was to examine cross-sectional associations of socio-economic status  
5  
6 (i.e., income and education) with adherence to a Mediterranean dietary pattern, with the perspective  
7  
8 that encouraging people to adopt healthy eating behaviours would not be just a matter of good  
9  
10 willing but mainly an issue to develop concrete measures of intervention in terms of economic  
11  
12 availability. Moreover, our study investigated a potential relationship between low-income,  
13  
14 Mediterranean diet and obesity.  
15  
16  
17  
18  
19

## 20 MATERIAL AND METHODS

### 21 Study population

22  
23 The Moli-sani Project is a population-based cohort study which randomly recruited 24,325 citizens  
24  
25 of the Molise, a region placed between Central and Southern Italy. Between March 2005 and April  
26  
27 2010, the study enrolled men and women aged  $\geq 35$  years, randomly recruited from subjects  
28  
29 included in the city-hall registries of Molise (13). Exclusion criteria were pregnancy, disturbances  
30  
31 in understanding/ willing processes, ongoing poly-traumas or coma, refusal to sign the informed  
32  
33 consent. The cohort will be followed-up for incident cardiovascular and tumor events.  
34  
35  
36

37 After exclusion of subjects reporting personal history of cardiovascular disease (angina, myocardial  
38  
39 infarction, heart failure, revascularization procedures and stroke) (5.7%), cancer (3.1%) or diabetes  
40  
41 (6.0%) and of those for whom there were no information available on income (30.7%) mainly  
42  
43 because they refused to answer or did not possess any reliable information on this issue, 13,262  
44  
45 subjects were analysed. The latter were comparable with the whole Moli-sani Project population in  
46  
47 terms of Mediterranean dietary patterns and socio-economic features, whereas mean age of the  
48  
49 sample was slightly lower ( $53.3 \pm 11$  vs  $55.0 \pm 12$ ) and had a higher prevalence of men (50% vs  
50  
51 48%) compared with the whole population sample.  
52  
53  
54  
55

### 56 Dietary information

1  
2  
3  
4 The validated Italian EPIC food frequency questionnaire was used to evaluate food intake (14, 15).

5  
6 The questionnaire, computerized with tailor-made software, allowed to interview participants in an  
7  
8 interactive way, including illustrations of sample dishes of definite sizes or by reference to standard  
9  
10 portion sizes. To simplify interpretation of data and to minimize within-person variations in intakes  
11  
12 of individual foods, 188 food items were classified into 45 predefined food groups on the basis of  
13  
14 similar nutrient characteristics or culinary usage (Appendix 2). (Web only file).

15  
16  
17 Moderate alcohol intake was defined as regularly drinking less than two or one drinks a day, by  
18  
19 men and women, respectively.  
20

21  
22 Food consumption patterns were generated by using Principal Components Analysis (PCA)  
23  
24 conducted on the correlation matrix of 45 food groups (16). Three main factors emerged, in  
25  
26 agreement with previous findings in the same population (16). The first pattern, identified as “Olive  
27  
28 Oil and Vegetables”, was characterized by high positive loadings for olive oil, vegetables, legumes,  
29  
30 soups, fruits and fish. The second pattern, named “Pasta and Meat”, was characterized by high  
31  
32 positive loadings for pasta, cooked tomatoes, red meat, animal fats and alcoholic beverages, and  
33  
34 negative loadings of breakfast cereals and yogurt. The “Eggs and Sweets” pattern was  
35  
36 characterized by high positive loadings for eggs, margarines, processed meat and sugar and sweets.  
37  
38

39 We evaluated the adherence to the Mediterranean diet by using the Mediterranean Diet Score  
40  
41 (MDS) elaborated by Trichopoulou et al (17). Scoring was based on the intake of the following 9  
42  
43 items: vegetables, legumes, fruit and nuts, dairy products, cereals, meat and meat products, fish,  
44  
45 alcohol, and the ratio of monounsaturated:saturated fat. For most items, consumption above the  
46  
47 study median received 1 point; all other intakes received 0 points. For dairy products, meat and  
48  
49 meat products, consumption below the median received 1 point. Medians are gender specific. For  
50  
51 ethanol, men who consumed 10–50 gr/day and women who consumed 5–25 gr/day received 1  
52  
53 point; otherwise, the score was 0. The possible scores ranged between 0 and 9, the latter reflecting  
54  
55 the maximal adherence.  
56  
57  
58  
59  
60

1  
2  
3  
4 We also used a new Italian Mediterranean Index (IMI) whose score is based on the intake of 11  
5  
6 items: high intake of 6 typical Mediterranean foods (pasta; typical Mediterranean vegetables such as  
7  
8 raw tomatoes, leafy vegetables, onion, and garlic, salad, and fruiting vegetables; fruit; legumes;  
9  
10 olive oil; and fish); low intake of 4 non-Mediterranean foods (soft drinks, butter, red meat, and  
11  
12 potatoes); and alcohol consumption. If consumption of typical Mediterranean foods was in the 3rd  
13  
14 tertile of the distribution, the person received 1 point; all other intakes received 0 points. If  
15  
16 consumption of non-Mediterranean foods was in the first tertile of the distribution, the person  
17  
18 received 1 point. Ethanol received 1 point for intake up to 12 gr/day; abstainers and persons who  
19  
20 consumed >12 gr/day received 0 points. Possible scores ranged from 0 to 11(18). Such Italian  
21  
22 Index was conceived to better capture healthy eating including foods, such as pasta, more typically  
23  
24 available in Italy.  
25  
26  
27  
28  
29  
30

### 31 **Data collection**

32  
33 Body Mass Index (BMI) was calculated as  $\text{kg/m}^2$ . Waist circumferences were measured according  
34  
35 to the NIH, Heart, Lung, and Blood guidelines (19). Blood pressure was measured by an automatic  
36  
37 device (OMRON-HEM-705CP) three times on the non-dominant arm, with the patient lying down  
38  
39 for about 5 minutes. Hypertension was defined as systolic  $\text{BP} \geq 160$  mm Hg and/or diastolic  $\text{BP} \geq 95$   
40  
41 mm Hg, or using pharmacological treatment. Physical activity was assessed by a structured  
42  
43 questionnaire (24 questions on working and leisure time and sport participation) and expressed as  
44  
45 daily energy expenditure in metabolic equivalent task-hours (MET/d).  
46  
47

48  
49 Serum lipids and glucose were assayed by enzymatic reaction methods using an automatic analyzer  
50  
51 (ILab 350, Instrumentation Laboratory (IL), Milan, Italy). LDL-cholesterol was calculated  
52  
53 according to Friedewald. High sensitivity C reactive protein (CRP) was measured in fresh serum, by  
54  
55 a latex particle-enhanced immunoturbidimetric assay (IL Coagulation Systems on ACL9000). Inter-  
56  
57 and intra-day CV were 5.5% and 4.17%, respectively.  
58  
59  
60

## Socio-economic variables

Household net income categories were considered as low (<10,000 euro/ year), low-medium (>10,000 <25,000 euro/year), medium – high (>25,000< 40,000 euro/year), high (>40,000 euro/year).

Education level was divided into three categories:  $\leq 8$  (low) ,  $> 8$  and  $\leq 13$ (medium) and  $> 13$  (high) years of studies.

Socio-economic status (SES) was expressed as a score based on 5 variables: dwelling ownership and ratio between the number of living-in family members and number of rooms (People Room Density ), both currently and at childhood - and availability of hot water at home at childhood. The five components were dichotomized according to the median value, and a score of one was attributed to the category supposed to be marker of higher social status in comparison with the opposite category: thus we assigned a score of 1 to people living in a house with living-in family members/room density  $> 0.6$  or dwelling ownership or with availability of hot water and a score 0 to people with living-in family members/room density  $\leq 0.6$ , no dwelling ownership or with unavailability of hot water. The SES score did not include income and education. Marital status was considered as married or live-in partner vs others (divorced, unmarried, widower).

## Statistical analysis

Values for continuous variables are means  $\pm$  Standard Deviation. CRP was transformed into natural logarithm to reduce positive skewness, but data were reported untransformed for clarity. Analysis of variance for continuous or categorical variables was applied to test the associations in Table 1.

Multivariable analysis of variance with appropriate terms for interaction was used for testing the association of adherence to MD scores, dietary patterns or dietary variables (considered as the

1  
2  
3  
4 dependent variables) with categories of income or SES components. By using multivariable logistic  
5  
6 regression analysis (with appropriate terms for interaction), odds ratio (ORs) with corresponding  
7  
8 95% confidence intervals (95% CI) were calculated to quantify the association of income or  
9  
10 education levels with adherence to MD-like eating scores or obesity. High adherence to MD, as  
11  
12 stated by the Medscore, was defined when the score was  $\geq 6$  points whereas a low adherence when  
13  
14 the score was  $\leq 3$  points. Subjects with intermediate values (4 or 5 points) were excluded from this  
15  
16 analysis in order to focus on the two extreme categories of adherence. The same was done for the  
17  
18 IMI score, but the cut-off was  $\geq 5$  for the higher adherence or  $\leq 3$  for the lower adherence category.  
19  
20 The data analysis was generated using SAS/STAT software, Version 9.1.3 of the SAS System for  
21  
22 Windows©2009. SAS Institute Inc. and SAS are registered trademarks of SAS Institute Inc., Cary,  
23  
24 NC, USA.  
25  
26  
27  
28  
29  
30

## 31 RESULTS

### 32 Income groups

33  
34 Table 1 shows the characteristics of the whole population by income categories. People in the  
35  
36 uppermost income group were 53.5% men and showed a better health profile, having significantly  
37  
38 lower values of BMI, systolic blood pressure, C-reactive protein, triglycerides and blood glucose.  
39  
40 Obesity prevalence ( $\text{BMI} > 30 \text{ Kg/m}^2$ ) differed according to income; it was higher in the lowest-  
41  
42 income group (36%) and lower in the highest- income category (20%,  $p < .0001$  Tab. 1).  
43  
44

45  
46 In Table 2 the association among income levels, dietary habits and single food groups are reported.  
47  
48 Higher income groups were significantly associated with greater adherence to both score indexes,  
49  
50 namely MDS ( $p < .0001$ ) and IMI ( $p < .0001$ ) in the model adjusted for age, sex, daily energy intake,  
51  
52 BMI, physical activity, smoking, alcohol consumption and marital status.  
53  
54

55  
56 Similar data were obtained after stratification by gender ( $p$  for interaction=0.24 for MDS and  $p$  for  
57  
58 interaction =0.41 for IMI) and age ( $p$  for interaction=0.43 for IMI). However, the increasing  
59  
60

1  
2  
3  
4 adherence to MD according to income was more pronounced in the elderly when it was measured as  
5  
6 MSD (p for interaction=0.0002 ;  $\beta = 0.063$ , SE±0.021, p=0.0028 for people ≤ 65 years and  $\beta =$   
7  
8 0.17, SE±0.051, p =0.0008, for people > 65 years).

9  
10 Subjects in the lower income categories showed poor adherence to the Olive oil and Vegetables  
11  
12 dietary pattern (p<.0001) whereas a greater adherence to the Western type pattern (Dietary pattern  
13  
14 3) was observed. Similar results were observed after stratification for gender and age (data not  
15  
16 shown).  
17  
18  
19

20  
21 In addition, analysis of single foods consumption by income categories showed that people with the  
22  
23 higher income reported higher intake of the basic components of the MD, that is fish, fruits,  
24  
25 legumes and reduced consumption of animal fats, processed meat and white meat whose frequent  
26  
27 consumption is more typical of a Western dietary model.  
28  
29

30  
31 The odds of having highest adherence to the MD, that raised with both MDS and IMI scores, clearly  
32  
33 increased according to income levels (Tab. 3). People having the highest income had 54% (MDS)  
34  
35 or 72% (IMI) statistically significant higher probability to stick to a MD-like eating pattern than  
36  
37 those in the lowest income group (Tab. 3).  
38  
39

40  
41 Regarding alcohol consumption (Tab.2), the highest income group appeared to include the highest  
42  
43 prevalence of moderate drinkers (41.7% versus 27.5% recorded in the lowest income group) as  
44  
45 already found on a sample of Danish population (17).  
46  
47

#### 48 **Socio-economic status and education**

49  
50 Income fairly correlated with SES (Spearman correlation coefficients = 0.24, p< 0.0001) and  
51  
52 education (r=0.51, p<0.0001) whereas correlation between SES and education was r=0.34,  
53  
54 p<0.0001.  
55  
56  
57  
58  
59  
60



1  
2  
3  
4 Education was positively associated with adherence to MD, measured by both MDS ( $p=0.034$ ) and  
5  
6 IMI ( $p=0.0014$ ), while SES was not ( $p=0.19$  for MDS and  $p=0.78$  for IMI) in the fully adjusted  
7  
8 model also including education and income.  
9

10  
11 Odds of having higher adherence according to education levels were 1.26 and 1.27 ( $p$  for  
12  
13 trend= $0.0020$ ) for MDS and 1.16 and 1.33 ( $p$  for trend= $0.0009$ ) for IMI (Tab.4).  
14

### 15 16 17 **Stratification by education**

18  
19 As less educated people may show lower adherence because of lack of knowledge about healthy  
20  
21 habits (21), we performed additional analyses stratified for educational level.  
22

23  
24 Either in lower ( $\leq 8$ ), medium ( $>8$  and  $\leq 13$ ) and higher ( $>13$  years of studies) educated groups  
25  
26 adherence to Mediterranean diet followed the gradient of income categories (Tab. 4), with the  
27  
28 exception of the uppermost educated group, when the MDS score was used ( $p=0,067$ ). However  
29  
30 the interaction test was not significant for either score. Accordingly, education was related to  
31  
32 dietary pattern independently from income. Indeed, by dividing income levels into two main  
33  
34 categories (low and low-medium VS high and high-medium), in the fully adjusted model, education  
35  
36 was positively associated with dietary patterns both in the lowest (MDS:  $p=0.032$  and IMI:  
37  
38  $p=0.0025$ ) and in the highest income group (MDS:  $p=0.0067$  and IMI:  $p=0.0010$  ).  
39  
40  
41  
42  
43

### 44 **Income/education, Mediterranean diet and obesity**

45  
46 Finally, we evaluated the association of income and education on diet quality and then on obesity in  
47  
48 a unique statistical model. Odds ratio of having obesity decreased according to income (OR= $0.72$ ,  
49  
50 95%CI: 0.59 to 0.86 for highest versus lowest income group) and education level (OR= $0.53$ ,  
51  
52 95%CI: 0.45 to 0.61 for highest versus lowest education level). These odds ratios remained  
53  
54 unchanged when in the model diet quality (measured as Mediterranean scores) was included.  
55  
56 Moreover, the association between income or education with obesity was equally observed in both  
57  
58  
59  
60

1  
2  
3  
4 highest and lowest MD adherence categories as defined in Table 3 (the four terms for interactions  
5  
6 among income or education with MDS or IMI were all  $p>0.35$ ).  
7  
8

## 9 10 11 **DISCUSSION**

12  
13 People with higher income and higher levels of education had a greater adherence to MD-like  
14  
15 eating patterns, as measured by three different parameters: two *a priori* Mediterranean scores (the  
16  
17 traditional one introduced by Trichopoulou and a more recent Italian Mediterranean index), and the  
18  
19 *a posteriori* dietary patterns derived from principal components analysis. Evidence on the health  
20  
21 benefits of the MD is based on several studies and meta-analyses (1,7,21). However, adherence to  
22  
23 this healthy eating pattern is rapidly disappearing in the countries of Southern Europe where it  
24  
25 originated and persisted during centuries, including the areas of Northern Africa in which there is an  
26  
27 increasing prevalence of metabolic disorders and consequent cardiovascular disease mainly due to  
28  
29 the changing in lifestyle habits (22). Socio-economic status has been included among the factors  
30  
31 related to chronic disease onset, and disparities in dietary habits by social class have been advocated  
32  
33 to explain at least in part the higher CVD risk factors profile observed among low SES groups (23).  
34  
35 Our results agree with the conclusions reported in the review by Darmon et al. (10) that higher-  
36  
37 quality diets are mainly consumed by better educated and more affluent people while lower socio-  
38  
39 economic groups tend to have lower quality diets thus exposing themselves to a higher risk to  
40  
41 develop diet-related diseases. Similar conclusions were reached by other investigations too (24)  
42  
43 suggesting that low socio-economic groups end with having poorer diets. These findings are  
44  
45 supported, at least in part, by the fact that following a Mediterranean dietary style could represent a  
46  
47 matter of money (9). Indeed researchers in Spain showed that MD is definitely more expensive to  
48  
49 follow than Western dietary patterns: this may represent a strong economic obstacle when  
50  
51 counselling people about the opportunity to follow a healthy diet because cost may become a  
52  
53 prohibitive factor (9). Aggrawal et al. (25) demonstrated that the well-known socio-economic  
54  
55  
56  
57  
58  
59  
60

1  
2  
3  
4 disparities in diet quality is mediated by food cost confirming that lower SES groups tend to  
5  
6 consume more energy dense and nutrient poor diets. However, the economic advantages of a  
7  
8 Mediterranean way of eating in terms of cost-effectiveness should be highlighted as shown in  
9  
10 patients with previous CVD, that could represent an exceptional return on investment (26).  
11  
12 Subjects with lower income had a greater prevalence of obesity too. The association between  
13  
14 obesity and socioeconomic factors has been previously observed (27) suggesting that the latter play  
15  
16 an important role in the risk of obesity and overweight not only in adults but also in children (28).  
17  
18 However our data show that the strong association observed between lower income or education  
19  
20 with obesity was not mediated by diet quality. Indeed, an additional analysis combining the impacts  
21  
22 of education or income on diet quality and then on obesity in a unique statistical model, showed that  
23  
24 the association remained unchanged when diet quality was included. According to these results, the  
25  
26 changes in obesity rates observed in the different income and education categories appear not  
27  
28 necessarily mediated by diet quality. However, the epidemiological evidence supporting a causal  
29  
30 link between Mediterranean diets and body weight is contrasting (29).  
31  
32 It is quite clear that accumulating proofs on the benefits of Mediterranean- like diets is an  
33  
34 insufficient prevention strategy as conditions allowing people to stick to healthier dietary habits  
35  
36 should also be clearly identified.  
37  
38 This study contributes to provide further evidence to the assumption that dietary habits are strongly  
39  
40 influenced by socio-economic factors, in particular by income which appears to play an important  
41  
42 role in determining people's eating choices (30). As far as education is concerned, previous studies  
43  
44 found a relationship between higher levels of education and healthy diets (31). In our research,  
45  
46 education resulted to be independently associated to MD and did not modify the association  
47  
48 between income levels and healthy dietary pattern as shown in the stratified analysis by education  
49  
50 levels.  
51  
52  
53  
54  
55  
56  
57  
58  
59  
60

1  
2  
3  
4 The promotion of healthy lifestyles and diets to prevent weight gain and related diseases has  
5  
6 jumped to the top of the priority list of the public health experts all over the world since obesity has  
7  
8 become a threatening epidemic. So far the traditional MD has proven to be an effective “remedy”  
9  
10 to the spreading of the major chronic disease, obesity and mortality. Our study highlights the strong  
11  
12 linkage among low income, poor adherence to MD and obesity prevalence.  
13

### 14 15 16 17 **Limitations of this study**

18  
19 A major limitation of the present study is that people self-reported their own income which is a  
20  
21 quite sensitive issue. Indeed we recorded a high percentage (30.7%) of non-respondent subjects  
22  
23 who refused to declare or did not know their family income. Yet such large non-respondent group is  
24  
25 very common in this type of investigation, especially among women and elderly (32) However,  
26  
27 there was no difference between the whole Moli-sani population and the subsample analyzed here  
28  
29 as far as dietary habits and socio-economic variables were concerned.  
30  
31

32  
33 Another inherent limit is represented by the cross-sectional nature of our study.  
34

35  
36 In addition, caution is needed in extending the results presented here to larger contexts since data  
37  
38 were collected in a region located between Central and Southern Italy, Mediterranean by tradition  
39  
40 and culture (13). Yet, the main characteristics of our population sample are comparable to those of  
41  
42 the Italian Cardiovascular Epidemiological Observatory (33), a large survey including random  
43  
44 samples of the general population recruited all over Italy; therefore our sample can be considered  
45  
46 representative at least of the whole Italian population.  
47  
48

### 49 50 **Strengths of this study**

51  
52 Our very large population sample is made of subjects coming from a quite homogenous  
53  
54 environment with no marked differences in terms of socioeconomic disparities, differently from  
55  
56 metropolitan areas, where previous studies found huge gaps among social classes and related health  
57  
58  
59  
60

1  
2  
3  
4 status at relatively small distances from the city centre (34). Bearing this in mind, the differences we  
5  
6 observed in the adherence to Mediterranean diet according to income indicate that also in a  
7  
8 environment homogeneous both for genetic and lifestyles, income and education can still play a role  
9  
10 in influencing dietary choices. Furthermore, diet quality showed a continued improvement across a  
11  
12 relatively small range of economic strata. Our “poorest” are represented by people earning less than  
13  
14 10,000 euro/net per year whilst the “richest” group is made of subjects with more than 40,000  
15  
16 euro/net per year. Such differences among income classes are quite restrained and recall what  
17  
18 already said for the pretty homogeneous environment where our sample comes from. We are not  
19  
20 dealing with real huge socioeconomic and income differences. Despite this homogeneity, we did  
21  
22 observe notable changes in diet quality among different groups.  
23  
24

25  
26 The differences observed across the income strata would likely become even more evident in MD  
27  
28 importing countries where getting typical Mediterranean products is more difficult and expensive.  
29  
30 In addition, apparently for the first time this topic was addressed by using two *a priori*  
31  
32 Mediterranean scores (the traditional one introduced by Trichopoulou and a novel Italian  
33  
34 Mediterranean index), and the *a posteriori* dietary patterns derived from principal components  
35  
36 analysis. This leads to overcome the limitations each of these approaches may present. Indeed, the  
37  
38 “a priori” scores only reflect some aspects of diet and do not account for correlations between score  
39  
40 components. Instead, the “a posteriori” approaches have the weakness of low reproducibility,  
41  
42 different populations having different non-predefined dietary patterns. Therefore, the use of an  
43  
44 index based on the foods actually available to Italians and traditional Italian cooking styles should  
45  
46 improve the ability of the index to classify the Italian cohort.  
47  
48  
49  
50  
51  
52  
53  
54

## 55 CONCLUSIONS

56  
57  
58  
59  
60

1  
2  
3  
4 Our data suggest consistent associations of income and education with dietary patterns and may  
5  
6 foster discussion on healthy food accessibility in terms of economic costs. The cost of MD seem to  
7  
8 represent a real obstacle to healthy diet driving people to choose alternative ways of eating usually  
9  
10 inspired by the need to save money in everyday life. Public health policies shall take into account  
11  
12 the fact that correct dietary habits need to be promoted by allowing people to choose the best for  
13  
14 their own health. It is definitely an interdisciplinary issue which shall call to action every single  
15  
16 actor of modern societies otherwise condemned to increase their already heavy burden of chronic  
17  
18 diseases. As already noted by others who dealt with this topic (10), the promotion of high-cost  
19  
20 foods to low-income people without taking food costs into account is not likely to be successful.  
21  
22  
23  
24  
25  
26  
27  
28  
29  
30  
31  
32  
33  
34  
35  
36  
37  
38  
39  
40  
41  
42  
43  
44  
45  
46  
47  
48  
49  
50  
51  
52  
53  
54  
55  
56  
57  
58  
59  
60

Table 1 Characteristics of the whole population as a whole and according to four income categories

|                                      | Income Categories |                             |                                         |                                        |                                | P value* |
|--------------------------------------|-------------------|-----------------------------|-----------------------------------------|----------------------------------------|--------------------------------|----------|
|                                      | All<br>(n=13,262) | < 10,000<br>(n = 980, 7.4%) | > 10,000 < 25,000<br>(n = 5,751, 43.4%) | > 25,000 < 40,000<br>(n= 4,120, 31.1%) | > 40,000<br>(n = 2,411, 18.2%) |          |
| Age (years)                          | 53.3 (10.6)       | 60.1 (12.7)                 | 54.0 (11.2)                             | 51.4 (9.5)                             | 52.3 (8.8)                     | <.0001   |
| Sex (males, n, %)                    | 6,590 (49.7%)     | 348 (35.5%)                 | 2,834 (49.3%)                           | 2,117 (51.4%)                          | 1,291 (53.5%)                  | <.0001   |
| BMI (kg/m <sup>2</sup> )             | 27.7 (4.6)        | 28.7 (5.3)                  | 28.2 (4.7)                              | 27.3 (4.3)                             | 27.0 (4.0)                     | <.0001   |
| WH-ratio                             | 0.91 (0.07)       | 0.92 (0.079)                | 0.91 (0.075)                            | 0.91 (0.075)                           | 0.91 (0.074)                   | 0.019    |
| Systolic blood pressure ( mmHg)      | 139.0 (20.1)      | 143.4 (21.0)                | 140.1 (20.4)                            | 137.3 (19.6)                           | 137.4 (19.2)                   | 0.0053   |
| Diastolic blood pressure ( mmHg)     | 82.7 (9.6)        | 81.7 (9.7)                  | 82.8 (9.4)                              | 82.7 (9.7)                             | 82.8 (10.0)                    | 0.0038   |
| Total physical activity (MET-h /day) | 43.4 (8.7)        | 44.8 (10.4)                 | 45.0 (9.7)                              | 42.5 (7.9)                             | 40.4 (5.2)                     | <.0001   |
| Leisure time PA ( MET-h /day )       | 2.18 (1.88)       | 1.81 (1.67)                 | 2.10 (1.78)                             | 2.22 (1.96)                            | 2.28 (1.94)                    | 0.20     |
| Working PA ( MET-h /day )            | 14.6 (12.2)       | 22.4 (19.1)                 | 18.8 (14.3)                             | 12.7 (10.4)                            | 10.2 (6.4)                     | <.0001   |
| Smokers n, %                         |                   |                             |                                         |                                        |                                |          |
| <i>Never</i>                         | 6,370 (48.1%)     | 558 (56.9%)                 | 2,838 (49.4%)                           | 1,901 (46.2%)                          | 1,073 (44.5%)                  | <.0001   |
| <i>Current</i>                       | 3,296 (25.0%)     | 222 (22.6%)                 | 1,418 (24.7%)                           | 1,060 (25.8%)                          | 596 (24.7%)                    |          |
| <i>Former</i>                        | 3,585 (27.5%)     | 200 (20.4%)                 | 1,490 (25.9%)                           | 1,154 (28.0%)                          | 741 (30.7%)                    |          |
| Total cholesterol ( mg/dL)           | 212.3 (40.2)      | 214.3 (41.9)                | 212.8 (40.4)                            | 211.8 (40.4)                           | 211.0 (38.7)                   | 0.64     |
| HDL ( mg/dL)                         | 57.0 (14.5)       | 58.4 (14.4)                 | 57.2 (14.4)                             | 56.6 (14.5)                            | 56.8 (14.6)                    | 0.35     |
| LDL ( mg/dL)                         | 130.3 (33.6)      | 130.8 (35.7)                | 130.3 (33.8)                            | 130.2 (33.6)                           | 130.1 (32.7)                   | 0.65     |
| CRP ( mg/dL)                         | 2.4 (3.0)         | 3.0 (3.7)                   | 2.6 (3.1)                               | 2.2 (2.9)                              | 2.1 (2.7)                      | <.0001   |
| Triglycerides ( mg/dL)               | 127.0 (83.8)      | 129.1 (87.0)                | 129.1 (84.5)                            | 126.1 (85.0)                           | 122.6 (78.4)                   | 0.0002   |
| Blood glucose ( mg/dL)               | 96.8 (17.0)       | 97.7 (20.4)                 | 97.2 (16.8)                             | 96.4 (16.5)                            | 96.4 (16.4)                    | 0.17     |
| Obesity (n, %)                       | 3,563 (26.9%)     | 352 (36.0%)                 | 1,733 (30.1%)                           | 988 (24.0%)                            | 490 (20.3%)                    | <.0001   |
| Hypertension (n, %)                  | 4,469 (33.7%)     | 452 (46.2%)                 | 2,006 (34.9%)                           | 1,259 (30.6%)                          | 752 (31.2%)                    | 0.79     |

\* P value adjusted for sex, age, energy intake and marital status

Table 2 Mediterranean diet adherence and dietary consumption as a whole and according to four income categories

|                                                         | Income categories |                             |                                         |                                        |                                | P value * |
|---------------------------------------------------------|-------------------|-----------------------------|-----------------------------------------|----------------------------------------|--------------------------------|-----------|
|                                                         | All<br>(n=13,262) | < 10,000<br>(n = 980, 7.4%) | > 10,000 < 25,000<br>(n = 5,751, 43.4%) | > 25,000 < 40,000<br>(n= 4,120, 31.1%) | > 40,000<br>(n = 2,411, 18.2%) |           |
| <b>Mediterranean score (MDS)</b>                        | 4.44 (1.64)       | 4.32 (1.61)                 | 4.40 (1.62)                             | 4.46 (1.62)                            | 4.53 (1.70)                    | <.0001    |
| <b>Italian Mediterranean index (IMI)</b>                | 3.26 (1.71)       | 3.20 (1.64)                 | 3.15 (1.68)                             | 3.30 (1.71)                            | 3.49 (1.79)                    | <.0001    |
| <b>Dietary Pattern 1<br/>(Olive Oil and Vegetables)</b> | 0.042 (0.95)      | -0.066 (0.92)               | 0.021 (0.94)                            | 0.070 (0.95)                           | 0.091 (0.97)                   | <.0001    |
| <b>Dietary Pattern 2<br/>(Pasta and Meat)</b>           | 0.036 (0.95)      | 0.0078 (0.91)               | 0.093 (0.95)                            | 0.0053 (0.95)                          | - 0.036 (0.97)                 | <.0001    |
| <b>Dietary Pattern 3<br/>(Eggs and sweets)</b>          | 0.015 (0.85)      | -0.13 (0.88)                | 0.040 (0.86)                            | 0.044 (0.85)                           | -0.033 (0.82)                  | <.0001    |
| <b>Energy intake (kcal/day)</b>                         | 2177.4 (640.7)    | 2,062.5 (704.1)             | 2,186.3 (649.0)                         | 2,190.6 (627.8)                        | 2,180.4 (610.7)                | 0.58      |
| <b>Alcohol intake (gr/day)</b>                          | 16.5 (22.4)       | 16.1 (25.8)                 | 18.2 (24.5)                             | 15.3 (20.3)                            | 14.9 (18.6)                    | <.0001    |
| <b>Moderate drinkers (n, %)</b>                         | 4,303 (33.3%)     | 261 (27.5%)                 | 1,646 (29.2%)                           | 1,419 (35.3%)                          | 977 (41.7%)                    | <.0001    |
| <b>Wine consumption (ml/day)</b>                        | 135.5 (188.7)     | 133.3 (209.6)               | 148.9 (203.7)                           | 125.5 (175.4)                          | 121.8 (160.4)                  | <.0001    |
| <b>Olive oil (gr/day)</b>                               | 24.2 (9.2)        | 22.9 (9.0)                  | 24.4 (9.3)                              | 24.4 (9.2)                             | 24.0 (9.1)                     | 0.0034    |
| <b>Animal fat (gr/day)</b>                              | 1.26 (1.41)       | 1.21 (1.37)                 | 1.34 (1.45)                             | 1.25 (1.41)                            | 1.11 (1.31)                    | <.0001    |
| <b>Fish (gr/day)</b>                                    | 20.9 (17.0)       | 17.5 (15.5)                 | 19.4 (16.3)                             | 22.1 (17.4)                            | 23.9 (18.0)                    | <.0001    |
| <b>Processed meat (gr/day)</b>                          | 30.4 (20.9)       | 27.4 (20.0)                 | 31.5 (21.8)                             | 30.7 (20.5)                            | 28.6 (19.9)                    | <.0001    |
| <b>Cooked vegetables (gr/day)</b>                       | 73.5 (43.4)       | 71.2 (42.8)                 | 74.8 (44.0)                             | 74.0 (42.5)                            | 70.6 (43.4)                    | 0.0006    |
| <b>Legumes (gr/day)</b>                                 | 28.3 (22.1)       | 27.1 (20.3)                 | 27.1 (21.6)                             | 28.4 (21.9)                            | 31.3 (24.2)                    | <.0001    |
| <b>Nuts and seeds (gr/day)</b>                          | 0.89 (2.3)        | 0.90 (3.2)                  | 0.87 (2.3)                              | 0.88 (2.1)                             | 0.94 (2.2)                     | 0.34      |
| <b>Red meat (gr/day)</b>                                | 47.8 (26.0)       | 44.7 (26.3)                 | 48.8 (25.9)                             | 47.9 (25.8)                            | 46.8 (26.3)                    | 0.0008    |
| <b>White meat (gr/day)</b>                              | 26.4 (18.8)       | 29.6 (19.8)                 | 28.1 (19.3)                             | 25.3 (17.8)                            | 23.2 (18.1)                    | <.0001    |
| <b>Fruits (gr/day)</b>                                  | 358.5 (204.3)     | 362.7 (211.1)               | 354.9 (201.2)                           | 355.7 (198.9)                          | 370.3 (217.0)                  | 0.015     |
| <b>Crustaceans, molluscs, seafood (gr/day)</b>          | 11.0 (10.1)       | 8.9 (8.8)                   | 10.7 (9.9)                              | 11.7 (10.7)                            | 11.5 (10.0)                    | <.0001    |
| <b>Vegetable oils (no olive; gr/day)</b>                | 0.28 (0.81)       | 0.33 (1.23)                 | 0.29 (0.79)                             | 0.28 (0.69)                            | 0.27 (0.84)                    | 0.18      |
| <b>Refined grains (pasta and bread; (gr/day)</b>        | 198.3 (101.9)     | 193.5 (104.5)               | 201.3 (103.3)                           | 196.3 (99.2)                           | 196.8 (101.9)                  | 0.0004    |
| <b>Sugar (gr/day)</b>                                   | 11.0 (10.4)       | 10.3 (9.7)                  | 11.2 (10.9)                             | 11.1 (10.3)                            | 10.4 (9.8)                     | <.0001    |

\*P value adjusted for sex, age, energy intake, BMI, physical activity, smoking, alcohol consumption, marital status



**Table 3 Odds ratios of having high adherence to Mediterranean diet according to income, education and socioeconomic status**

|                             | Mediterranean score  |                   |      |             | Italian Mediterranean Index |                  |      |             |
|-----------------------------|----------------------|-------------------|------|-------------|-----------------------------|------------------|------|-------------|
|                             | Low<br>(n=3,843)     | High<br>(n=3,518) | OR   | (95% CI)    | Low<br>(n=4704)             | High<br>(n=3089) | OR   | (95% CI)    |
| <b>Income</b>               |                      |                   |      |             |                             |                  |      |             |
| < 10,000                    | 310 (8.1%)           | 231 (6.6%)        | -1-  | (referent)  | 353 (7.5%)                  | 209 (6.8%)       | -1-  | (referent)  |
| > 10,000 < 25,000           | 1,694 (44.1%)        | 1,470 (41.8%)     | 1.28 | (1.04-1.57) | 2,161 (45.9%)               | 1,201 (38.9%)    | 1.07 | (0.87-1.32) |
| > 25,000 < 40,000           | 1,153 (30.0%)        | 1,116 (31.7%)     | 1.51 | (1.21-1.88) | 1,436 (30.5%)               | 995 (32.2%)      | 1.34 | (1.07-1.69) |
| > 40,000                    | 686 (17.9%)          | 701 (19.9%)       | 1.54 | (1.21-1.97) | 754 (16.0%)                 | 684 (22.1%)      | 1.72 | (1.34-2.21) |
|                             | (p for trend=0.0002) |                   |      |             | (p for trend<.0001)         |                  |      |             |
| <b>Education level</b>      |                      |                   |      |             |                             |                  |      |             |
| Low                         | 1,775 (46.2%)        | 1,571 (44.7%)     | -1-  | (referent)  | 2,250 (47.8%)               | 1,307 (42.3%)    | -1-  | (referent)  |
| Medium                      | 1,504 (39.1%)        | 1,421 (40.4%)     | 1.26 | (1.11-1.43) | 1,860 (39.6%)               | 1,283 (41.5%)    | 1.16 | (1.02-1.31) |
| High                        | 564 (14.7%)          | 525 (14.9)        | 1.27 | (1.06-1.52) | 592 (12.6%)                 | 499 (16.1%)      | 1.33 | (1.11-1.60) |
|                             | (p for trend=0.0020) |                   |      |             | (p for trend=0.0009)        |                  |      |             |
| <b>Socioeconomic status</b> |                      |                   |      |             |                             |                  |      |             |
| Low                         | 1,097 (29.1%)        | 1,097 (32.2%)     | -1-  | (referent)  | 1,462 (32.2%)               | 927 (30.9%)      | -1-  | (referent)  |
| Medium                      | 1,155 (31.1%)        | 1,095 (32.1%)     | 0.94 | (0.83-1.07) | 1,414 (31.1%)               | 930 (31.0%)      | 1.00 | (0.88-1.14) |
| High                        | 1,475 (39.8%)        | 1,218 (35.7%)     | 0.88 | (0.77-1.00) | 1,664 (36.7%)               | 1,144 (38.1%)    | 0.98 | (0.86-1.12) |
|                             | (p for trend=0.054)  |                   |      |             | (p for trend =0.82)         |                  |      |             |

The logistic model included income, education, socioeconomic status and sex, age, energy intake, BMI, physical activity, smoking, alcohol consumption, marital status

**Table 4 Mediterranean diet adherence according to four income levels and stratified by education**

|                                               | Income Categories |                   |                   |             | P value * |
|-----------------------------------------------|-------------------|-------------------|-------------------|-------------|-----------|
|                                               | < 10,000          | > 10,000 < 25,000 | > 25,000 < 40,000 | > 40,000    |           |
| <b>Lower Education</b><br>(n = 6,101, 46.0%)  | (n=829)           | (n=3,745)         | (n=1,260)         | (n=267)     |           |
| Mediterranean Diet                            | 4.33 (1.60)       | 4.43 (1.63)       | 4.44 (1.60)       | 4.59 (1.64) | 0.040     |
| Italian Mediterranean Index                   | 3.19 (1.61)       | 3.13 (1.67)       | 3.22 (1.69)       | 3.54 (1.73) | 0.0002    |
| <b>Medium Education</b><br>(n = 5,236, 39.5%) | (n=137)           | (n=1,746)         | (n=2,184)         | (n=1,169)   |           |
| Mediterranean Diet                            | 4.16 (1.64)       | 4.33 (1.60)       | 4.50 (1.63)       | 4.54 (1.67) | 0.0041    |
| Italian Mediterranean Index                   | 3.21 (1.67)       | 3.14 (1.69)       | 3.33 (1.73)       | 3.43 (1.81) | <.0001    |
| <b>Higher Education</b><br>(n = 1,922, 14.5%) | (n=13)            | (n=258)           | (n=676)           | (n=975)     |           |
| Mediterranean Diet                            | 5.61 (1.85)       | 4.43 (1.61)       | 4.38 (1.60)       | 4.50 (1.76) | 0.067     |
| Italian Mediterranean Index                   | 3.77 (2.68)       | 3.43 (1.63)       | 3.33 (1.70)       | 3.56 (1.77) | 0.041     |

\*P value adjusted for sex, age, energy intake, BMI, physical activity, smoking, alcohol consumption, marital status

**REFERENCES**

1. Sofi F, Abbate R, Gensini GF, et al. Accruing evidence on benefits of adherence to the Mediterranean diet on health: an updated systematic review and meta-analysis. *Am J Clin Nutr.* 2010;92:1189-96.
2. de Lorgeril M, Salen P, Martin JL, Monjaud I, Delaye J, Mamelle N. Mediterranean diet, traditional risk factors, and the rate of cardiovascular complications after myocardial infarction: final report of the Lyon Diet Heart Study. *Circulation.* 1999;99:779-85.
3. de Lorgeril M, Salen P, Martin JL, Monjaud I, Boucher P, Mamelle N. Mediterranean dietary pattern in a randomized trial: prolonged survival and possible reduced cancer rate. *Arch Intern Med.* 1998;158:1181-7.
4. <http://www.unesco.org/culture/ich/en/RL/00394>
5. Keys A. Seven countries. A multivariate analysis of death, coronary heart disease. Cambridge MA: Harvard University Press; 1980.
6. Laccetti R, Pota A, Stranges S, et al. Evidence on the prevalence and geographic distribution of major cardiovascular risk factors in Italy. *Public Health Nutr.* 2012;30:1-11
7. Bonaccio M, Iacoviello L, de Gaetano G. The Mediterranean diet: The reasons for a success. *Thromb Res.* 2012 ;129:401-4
8. Prentice AM. The emerging epidemic of obesity in developing countries. *Int J Epidemiol.* 2006;35:93-9
9. Lopez CN, Martinez-Gonzalez MA, Sanchez-Villegas A, et al. Costs of Mediterranean and western dietary patterns in a Spanish cohort and their relationship with prospective weight change. *J Epidemiol Community Health.* 2009;63:920-7

- 1  
2  
3  
4 10. Darmon N, Drewnowski A. Does social class predict diet quality? *Am J Clin Nutr*.  
5  
6 2008;87:1107-17  
7
- 8  
9 11. Esposito K, Kastorini CM, Panagiotakos DB, et al. Mediterranean diet and weight loss:  
10 meta-analysis of randomized controlled trials. *Metab Syndr Relat Disord*. 2011;9:1-12.  
11  
12
- 13 12. Schröder H, Marrugat J, Covas MI. High monetary costs of dietary patterns associated with  
14 lower body mass index: a population-based study. *Int J Obes (Lond)*. 2006;30:1574-9.  
15  
16
- 17 13. Iacoviello L, Bonanni A, Costanzo S, et al. The Moli-sani Project, a randomized,  
18 prospective cohort study in the Molise region in Italy; design, rationale and objectives.  
19  
20  
21  
22  
23 *Italian J Public Health* 2007; 4: 110-8
- 24 14. Pala V, Sieri S, Palli D, et al. Diet in the Italian EPIC cohorts: presentation of data and  
25 methodological issues. *Tumori*. 2003;89:594-607  
26  
27
- 28 15. Pisani P, Faggiano F, Krogh V, et al. Relative validity and reproducibility of a food  
29 frequency dietary questionnaire for use in the Italian EPIC centres. *Int J Epidemiol*. 1997;26  
30  
31  
32  
33  
34 (Suppl. 1): S152-60
- 35 16. Centritto F, Iacoviello L, di Giuseppe R, et al. Dietary patterns, cardiovascular risk factors  
36 and C-reactive protein in a healthy Italian population. *Nutr Metab Cardiovasc Dis*.  
37  
38  
39  
40  
41 2009;19:697-706
- 42 17. Trichopoulou A, Orfanos P, Norat T, et al. Modified Mediterranean diet and survival: EPIC-  
43 elderly prospective cohort study. *BMJ*. 2005;330 (7498);991.  
44  
45
- 46 18. Agnoli C, Krogh V, Grioni S, et al. A priori-defined dietary patterns are associated with  
47 reduced risk of stroke in a large Italian cohort. *J Nutr*. 2011;141:1552-8  
48  
49
- 50 19. Janssen I, Katzmarzyk PT, Ross R. Body mass index, waist circumference, and health risk:  
51 evidence in support of current National Institutes of Health guidelines. *Arch Intern Med*  
52  
53  
54  
55  
56  
57  
58  
59  
60 2002;162:2074–2079

- 1  
2  
3  
4 20. Nielsen NR, Schnohr P, Jensen G, et al. Is the relationship between type of alcohol and  
5 mortality influenced by socio-economic status? *J Intern Med.* 2004;255:280-8.  
6  
7  
8  
9 21. Sofi F, Cesari F, Abbate R, et al. Adherence to Mediterranean diet and health status: meta-  
10 analysis. *BMJ.* 2008;337: a1344.  
11  
12  
13 22. Mehio Sibai A, Nasreddine L, Mokdad AH, et al. Nutrition transition and cardiovascular  
14 disease risk factors in Middle East and North Africa countries: reviewing the evidence. *Ann*  
15 *Nutr Metab.* 2010;57:193-203.  
16  
17  
18  
19 23. Panagiotakos DB, Pitsavos C, Chrysohoou C, et al. Dietary habits mediate the relationship  
20 between socio-economic status and CVD factors among healthy adults: the ATTICA study.  
21 *Public Health Nutr.* 2008;11:1342-9  
22  
23  
24  
25 24. Shahar D, Shai I, Vardi H, et al. Diet and eating habits in high and low socioeconomic  
26 groups. *Nutrition.* 2005;21:559-66  
27  
28  
29  
30 25. Aggarwal A, P Monsivais P, Cook AJ et al. Does diet cost mediate the relation between  
31 socioeconomic position and diet quality? *European Journal of Clinical Nutrition* 2011;  
32 65:1059-1066  
33  
34  
35  
36 26. Dalziel K, Segal L, de Lorgeril M. A mediterranean diet is cost-effective in patients with  
37 previous myocardial infarction. *J Nutr.* 2006 Jul;136(7):1879-85.  
38  
39  
40  
41 27. McLaren L. Socioeconomic status and obesity. *Epidemiol Rev.* 2007;29:29-48.  
42  
43  
44 28. Shrewsbury V, Wardle J. Socioeconomic status and adiposity in childhood: A systematic  
45 review of cross-sectional studies 1990–2005. *Obesity* 2008;16:275–284  
46  
47  
48  
49 29. The epidemiological evidence supporting a causal link between Mediterranean diets and  
50 body weight is contrasting. Buckland G, Bach A, Serra-Majem L. *Obesity and the*  
51 *Mediterranean diet: a systematic review of observational and intervention studies.* *Obes Rev*  
52 2008;9:582-93.  
53  
54  
55  
56  
57  
58  
59  
60

- 1  
2  
3  
4 30. Darmon N, Ferguson EL, Briand A. A cost constraint alone has adverse effects on food  
5  
6 selection and nutrient density: an analysis of human diets by linear programming. *J Nutr*  
7  
8 2002;132:3764-71.  
9  
10 31. Groth MV, Fagt S, Brøndsted L. Social determinants of dietary habits in Denmark., *Eur J*  
11  
12 *Clin Nutr.* 2001;55:959-66.  
13  
14 32. Kaplan GA, Keil JE. Socioeconomic factors and cardiovascular disease: a review of the  
15  
16 literature. *Circulation.* 1993;88:1973-98.  
17  
18 33. Giampaoli S, Rielli R, Dematté L, et al. The Italian observatory of cardiovascular risk: the  
19  
20 CUORE project experience [abstract]. *Circulation.* 2009;119:139.  
21  
22 34. Diez-Roux AV, Nieto FJ, Caulfield L, et al. Neighbourhood differences in diet: the  
23  
24 Atherosclerosis Risk in Communities (ARIC) Study. *J Epidemiol Community Health.*  
25  
26 1999;53: 55–63.  
27  
28  
29  
30  
31  
32  
33  
34  
35  
36  
37  
38  
39  
40  
41  
42  
43  
44  
45  
46  
47  
48  
49  
50  
51  
52  
53  
54  
55  
56  
57  
58  
59  
60

1  
2  
3  
4 **CONTRIBUTORS:** (MB, AB, LI designed the research; FDL, MB, managed data collection; MB,  
5  
6 ADC analyzed the data; MB, AB wrote the paper, MBD, GdG, LI originally inspired the research,  
7  
8 obtained the financial support and critically reviewed the manuscript). All Authors had full access  
9  
10 to all data in the study and took responsibility for the integrity of the data and the accuracy of the  
11  
12 data analysis. None of the Authors had a personal or financial conflict of interest.  
13  
14

### 17 **FUNDING**

19 The enrolment phase of the Moli-sani Project was supported by research grants from Pfizer  
20  
21 Foundation (Rome, Italy) and the Italian Ministry of University and Research (MIUR, Rome,  
22  
23 Italy)–Programma Triennale di Ricerca, Decreto no.1588. Neither Pfizer Foundation nor MIUR had  
24  
25 any role in study design, collection, analysis, and interpretation of data; in the writing of the report;  
26  
27 and in the decision to submit the article for publication.  
28  
29

30 All Authors are independent from funders.  
31  
32

### 35 **COMPETING INTEREST**

36  
37 None  
38  
39

40  
41  
42 **ETHICAL ISSUES:** The Moli-sani study was approved by the Ethics Committee of the Catholic  
43  
44 University of Rome. Participants signed the informed consent before taking part in the study.  
45  
46  
47

48 **DATA SHARING:** no additional data available.  
49  
50  
51  
52  
53  
54  
55  
56  
57  
58  
59  
60

## APPENDIX 1

### Moli-sani project Investigators

**Steering Committee:** Licia Iacoviello , Chairperson, Maria Benedetta Donati and Giovanni de Gaetano (Campobasso,Italy), Simona Giampaoli (Roma, Italy)

**Safety and data monitoring Committee:** Jos Vermeylen (Leuven, Belgio), Chairman, Ignacio De Paula Carrasco (Roma, Italy), Enrico Garaci (Roma, Italy)

**Event adjudicating Committee:** Deodato Assanelli (Brescia, Italy), Francesco Alessandrini, Vincenzo Centritto and Sergio Storti (Campobasso, Italy)), Paola Muti (Roma, Italy), Holger Schünemann (Hamilton, Ontario, Canada), Pasquale Spagnuolo and Dante Staniscia (Termoli, Italy),

**Scientific and organizing secretariat:** Francesco Zito (Coordinator, Campobasso and Termoli, Italy), Americo Bonanni , Chiara Cerletti, Amalia De Curtis, Augusto Di Castelnuovo, Licia Iacoviello, Roberto Lorenzet, Antonio Mascioli, Marco Olivieri and Domenico Rotilio (Campobasso, Italy).

**Data management and analysis:** Augusto Di Castelnuovo, Coordinator, Antonella Arcari, Marialaura Bonaccio, Floriana Centritto (till December 2008), Simona Costanzo, Romina di Giuseppe and Francesco Gianfagna (Campobasso, Italy),

**Informatics :** Marco Olivieri (Coordinator), Maurizio Giacci, Antonella Padulo (till September 2008) and Dario Petrarola (till September 2007) (Campobasso, Italy)

**Biobank and biochemical analyses:** Amalia De Curtis (Coordinator), Sara Magnacca, Federico Marracino (till June 2009), Maria Spinelli, Christian Silvestri (till December 2007), and Cristina Vallese (till September 2008) (Campobasso and Termoli, Italy):

**Genetics:** Daniela Cugino, Monica de Gaetano (till October 2008), Mirella Graziano, Iolanda Santimone, Maria Carmela Latella (till December 2008) and Gianni Quacquarello (till December 2007) (Campobasso, Italy)



1  
2  
3  
4 **Communication and Press Office:** Americo Bonanni (Coordinator), Marialaura Bonaccio and  
5  
6 Francesca De Lucia(Campobasso, Italy):  
7

8 **Moli-family Project:** Branislav Vohnout (Coordinator) (till December 2008), Francesco  
9  
10 Gianfagna, Andrea Havranova (till July 2008), Antonella Cutrone (till October 2007) (Campobasso,  
11  
12 Italy)  
13

14 **Recruitment staff** (Campobasso and Termoli, Italy): Franco Zito (General Coordinator),  
15  
16 *Secretariat:* Mariarosaria Persichillo (Coordinator), Angelita Verna, Maura Di Lillo (till March  
17  
18 2009), Irene Di Stefano (till March 2008), *Blood sample:* Agostino Pannichella, Antonio Rinaldo  
19  
20 Vizzarri, Branislav Vohnout (till December 2008), Agnieszka Pampuch (till August 2007);  
21  
22 *Spirometry:* Antonella Arcari (Coordinator), Daniela Barbato (till July 2009), Francesca Bracone,  
23  
24 Simona Costanzo, Carmine Di Giorgio (till September 2008), Sara Magnacca, Simona Panebianco  
25  
26 (till December 2008), Antonello Chiovitti (till March 2008), Federico Marracino (till December  
27  
28 2007), Sergio Caccamo (till August 2006), Vanesa Caruso (till May 2006); *Electrocardiogram:*  
29  
30 Livia Rago (Coordinator), Daniela Cugino, Francesco Zito, Alessandra Ferri (till October 2008),  
31  
32 Concetta Castaldi (till September 2008), Marcella Mignogna (till September 2008); Tomasz Guszc  
33  
34 (till January 2007), *Questionnaires:* Romina di Giuseppe, (Coordinator), Paola Barisciano, Lorena  
35  
36 Buonaccorsi, Floriana Centritto (till December 2008), Francesca De Lucia, Francesca Fanelli (till  
37  
38 January 2009), Iolanda Santimone, Anna Sciarretta, Maura Di Lillo (till March 2009), Isabella  
39  
40 Sorella (till September 2008), Irene Di Stefano (till March 2008), Emanuela Plescia (till December  
41  
42 2007), Alessandra Molinaro (till December 2006), and Christiana Cavone (till September 2005),  
43  
44 (Campobasso and Termoli, Italy):  
45  
46  
47  
48  
49

50 **Call Center:** Giovanna Galuppo (till June 2009), Maura Di Lillo (till March 2009), Concetta  
51  
52 Castaldi (till September 2008), Dolores D'Angelo (till May 2008) and Rosanna Ramacciato (till  
53  
54 May 2008) (Campobasso, Italy):  
55  
56  
57  
58  
59  
60

**APPENDIX 2** Food grouping used in the dietary pattern analyses

| <b>Foods or food groups</b> | <b>Food items</b>                                                                                                                                                              |
|-----------------------------|--------------------------------------------------------------------------------------------------------------------------------------------------------------------------------|
| Potatoes                    | Potatoes                                                                                                                                                                       |
| Cooked vegetables           | Leafy vegetables, root vegetables, cabbages, onion, carrots, mushrooms, egg plants, artichokes, sweet peppers, spinach, pumpkins, canned vegetables in oil, pickled vegetables |
| Raw vegetables              | Raw leafy vegetables, raw tomatoes                                                                                                                                             |
| Tomatoes (cooked)           | Tomato sauces, tomatoes                                                                                                                                                        |
| Legumes                     | Beans, lentils, peas, chick peas                                                                                                                                               |
| Fruit                       | Apples, pears, kiwi, bananas, grapes, peaches, apricots, oranges, tangerines, plums, strawberries, melon, khaki, figs, cherries                                                |
| Nuts and dried fruit        | Peanuts, almonds, hazelnuts, walnuts, dried figs, dried dates, prune                                                                                                           |
| Olives                      | Olives                                                                                                                                                                         |
| Milk                        | Milk                                                                                                                                                                           |
| Yogurt                      | Yogurt                                                                                                                                                                         |
| Fresh cheese                | Mozzarella, ricotta cheese, taleggio cheese, gorgonzola cheese, melted cheese slices, other soft cream cheese                                                                  |
| Seasoned cheese             | Fontina cheese, emmenthal, gruyere, parmesan, caciocavallo cheese, other seasoned cheese                                                                                       |
| Pasta and other grains      | Pasta, yellow maize meal                                                                                                                                                       |
| Rice                        | Rice                                                                                                                                                                           |
| Bread                       | White bread, bread with oil and other bread                                                                                                                                    |
| Crisp bread, rusks          | Breads sticks, crisp bread                                                                                                                                                     |
| Breakfast cereals           | Breakfast cereals                                                                                                                                                              |
| Salty biscuits              | Crackers                                                                                                                                                                       |
| Red meat                    | Beef, pork, lamb, horse, game, veal, other meats                                                                                                                               |
| White meat                  | Chicken, turkey, rabbit                                                                                                                                                        |
| Processed meat              | Sausages, ham, bologna sausage, dried beef, salami                                                                                                                             |

|    |                 |                                                              |
|----|-----------------|--------------------------------------------------------------|
| 1  |                 |                                                              |
| 2  |                 |                                                              |
| 3  |                 |                                                              |
| 4  | Offals          | Liver, offals                                                |
| 5  |                 |                                                              |
| 6  | Canned fish     | Canned tuna fish and other fish                              |
| 7  |                 |                                                              |
| 8  | Crustaceans,    |                                                              |
| 9  | molluscs        | Crustaceans, molluscs                                        |
| 10 |                 |                                                              |
| 11 | Fish            | Other fish                                                   |
| 12 |                 |                                                              |
| 13 | Egg             | Eggs                                                         |
| 14 |                 |                                                              |
| 15 | Vegetables oils | Seed oils (except olive oils)                                |
| 16 |                 |                                                              |
| 17 | Olive oil       | Olive oil                                                    |
| 18 |                 |                                                              |
| 19 | Butter          | Butter                                                       |
| 20 |                 |                                                              |
| 21 | Margarines      | Margarines                                                   |
| 22 |                 |                                                              |
| 23 | Animal fats     | Visible fat from meat, poultry skin, fat from ham            |
| 24 |                 |                                                              |
| 25 | Sugar & sweets  | Sugar, honey, cakes, ice cream, confections, pastry, pudding |
| 26 |                 |                                                              |
| 27 | Fruit juices    | Orange juice, grapefruit juices, other fruit juices          |
| 28 |                 |                                                              |
| 29 | Soft drinks     | Soft drinks                                                  |
| 30 |                 |                                                              |
| 31 | Coffee          | Coffee                                                       |
| 32 |                 |                                                              |
| 33 | Tea             | Tea                                                          |
| 34 |                 |                                                              |
| 35 | Other sauces    | Dressing sauces for pasta other than tomato sauce            |
| 36 |                 |                                                              |
| 37 | Mayonnaises     | Mayonnaises                                                  |
| 38 |                 |                                                              |
| 39 | Soups           | Vegetable soups                                              |
| 40 |                 |                                                              |
| 41 | Bouillon        | Meat and stock-cube broth                                    |
| 42 |                 |                                                              |
| 43 | Snacks          | Vegetable quiche                                             |
| 44 |                 |                                                              |
| 45 | Pizza           | Pizza                                                        |
| 46 |                 |                                                              |
| 47 | Wine            | Red wine, rosé wine, white wine                              |
| 48 |                 |                                                              |
| 49 | Spirits         | Alcoholic beverages other than wine or beer                  |
| 50 |                 |                                                              |
| 51 | Beer            | Beer                                                         |
| 52 |                 |                                                              |
| 53 |                 |                                                              |
| 54 |                 |                                                              |
| 55 |                 |                                                              |
| 56 |                 |                                                              |
| 57 |                 |                                                              |
| 58 |                 |                                                              |
| 59 |                 |                                                              |
| 60 |                 |                                                              |

STROBE Statement—Checklist of items that should be included in reports of *cross-sectional studies*

|                              | Item No | Recommendation                                                                                                                                                                                    |
|------------------------------|---------|---------------------------------------------------------------------------------------------------------------------------------------------------------------------------------------------------|
| <b>Title and abstract</b>    | 1       | (a) Indicate the study's design with a commonly used term in the title or the abstract                                                                                                            |
| <b>Yes</b>                   |         | (b) Provide in the abstract an informative and balanced summary of what was done and what was found                                                                                               |
| <b>Introduction</b>          |         |                                                                                                                                                                                                   |
| Background/rationale         | 2       | Explain the scientific background and rationale for the investigation being reported                                                                                                              |
| <b>Yes</b>                   |         |                                                                                                                                                                                                   |
| Objectives                   | 3       | State specific objectives, including any prespecified hypotheses                                                                                                                                  |
| <b>Yes</b>                   |         |                                                                                                                                                                                                   |
| <b>Methods</b>               |         |                                                                                                                                                                                                   |
| Study design                 | 4       | Present key elements of study design early in the paper                                                                                                                                           |
| <b>Yes</b>                   |         |                                                                                                                                                                                                   |
| Setting                      | 5       | Describe the setting, locations, and relevant dates, including periods of recruitment, exposure, follow-up, and data collection                                                                   |
| <b>Ref 13 and 16</b>         |         |                                                                                                                                                                                                   |
| Participants                 | 6       | (a) Give the eligibility criteria, and the sources and methods of selection of participants                                                                                                       |
| <b>Yes</b>                   |         |                                                                                                                                                                                                   |
| Variables                    | 7       | Clearly define all outcomes, exposures, predictors, potential confounders, and effect modifiers. Give diagnostic criteria, if applicable                                                          |
| <b>Yes</b>                   |         |                                                                                                                                                                                                   |
| Data sources/<br>measurement | 8*      | For each variable of interest, give sources of data and details of methods of assessment (measurement). Describe comparability of assessment methods if there is more than one group              |
| <b>Yes</b>                   |         |                                                                                                                                                                                                   |
| Bias                         | 9       | Describe any efforts to address potential sources of bias                                                                                                                                         |
| <b>Yes</b>                   |         |                                                                                                                                                                                                   |
| Study size                   | 10      | Explain how the study size was arrived at                                                                                                                                                         |
| <b>Ref 13</b>                |         |                                                                                                                                                                                                   |
| Quantitative variables       | 11      | Explain how quantitative variables were handled in the analyses. If applicable, describe which groupings were chosen and why                                                                      |
| <b>Yes</b>                   |         |                                                                                                                                                                                                   |
| Statistical methods          | 12      | (a) Describe all statistical methods, including those used to control for confounding                                                                                                             |
| <b>Yes</b>                   |         | (b) Describe any methods used to examine subgroups and interactions                                                                                                                               |
|                              |         | (c) Explain how missing data were addressed                                                                                                                                                       |
|                              |         | (d) If applicable, describe analytical methods taking account of sampling strategy                                                                                                                |
|                              |         | (e) Describe any sensitivity analyses                                                                                                                                                             |
| <b>Results</b>               |         |                                                                                                                                                                                                   |
| Participants                 | 13*     | (a) Report numbers of individuals at each stage of study—eg numbers potentially eligible, examined for eligibility, confirmed eligible, included in the study, completing follow-up, and analysed |
| <b>Yes</b>                   |         | (b) Give reasons for non-participation at each stage                                                                                                                                              |
|                              |         | (c) Consider use of a flow diagram                                                                                                                                                                |
| Descriptive data             | 14*     | (a) Give characteristics of study participants (eg demographic, clinical, social) and information on exposures and potential confounders                                                          |
| <b>Yes</b>                   |         | (b) Indicate number of participants with missing data for each variable of interest                                                                                                               |
| Outcome data                 | 15*     | Report numbers of outcome events or summary measures                                                                                                                                              |
| <b>Not applicable</b>        |         |                                                                                                                                                                                                   |
| Main results                 | 16      | (a) Give unadjusted estimates and, if applicable, confounder-adjusted estimates and their precision (eg, 95% confidence interval). Make clear which confounders were                              |
| <b>Yes</b>                   |         |                                                                                                                                                                                                   |

|                          |    |                                                                                                                                                                            |
|--------------------------|----|----------------------------------------------------------------------------------------------------------------------------------------------------------------------------|
|                          |    | adjusted for and why they were included                                                                                                                                    |
|                          |    | (b) Report category boundaries when continuous variables were categorized                                                                                                  |
|                          |    | (c) If relevant, consider translating estimates of relative risk into absolute risk for a meaningful time period                                                           |
| Other analyses           | 17 | Report other analyses done—eg analyses of subgroups and interactions, and sensitivity analyses                                                                             |
| <b>Yes</b>               |    |                                                                                                                                                                            |
| <b>Discussion</b>        |    |                                                                                                                                                                            |
| Key results              | 18 | Summarise key results with reference to study objectives                                                                                                                   |
| <b>Yes</b>               |    |                                                                                                                                                                            |
| Limitations              | 19 | Discuss limitations of the study, taking into account sources of potential bias or imprecision. Discuss both direction and magnitude of any potential bias                 |
| <b>Yes</b>               |    |                                                                                                                                                                            |
| Interpretation           | 20 | Give a cautious overall interpretation of results considering objectives, limitations, multiplicity of analyses, results from similar studies, and other relevant evidence |
| <b>Yes</b>               |    |                                                                                                                                                                            |
| Generalisability         | 21 | Discuss the generalisability (external validity) of the study results                                                                                                      |
| <b>Yes</b>               |    |                                                                                                                                                                            |
| <b>Other information</b> |    |                                                                                                                                                                            |
| Funding                  | 22 | Give the source of funding and the role of the funders for the present study and, if applicable, for the original study on which the present article is based              |
| <b>Yes</b>               |    |                                                                                                                                                                            |

\*Give information separately for exposed and unexposed groups.

**Note:** An Explanation and Elaboration article discusses each checklist item and gives methodological background and published examples of transparent reporting. The STROBE checklist is best used in conjunction with this article (freely available on the Web sites of PLoS Medicine at <http://www.plosmedicine.org/>, Annals of Internal Medicine at <http://www.annals.org/>, and Epidemiology at <http://www.epidem.com/>). Information on the STROBE Initiative is available at [www.strobe-statement.org](http://www.strobe-statement.org).

1  
2  
3  
4 **Low income is associated with poor adherence to Mediterranean Diet and higher prevalence**  
5  
6 **of obesity: cross-sectional results from the Moli-sani study**  
7  
8

9  
10  
11 Marialaura Bonaccio, research fellow\*§, Americo Bonanni, research fellow \*, Augusto Di  
12 Castelnuovo, postdoctoral researcher\*\*, Francesca De Lucia, postdoctoral researcher\*, Maria  
13 Benedetta Donati, scientific coordinator\*\*\*§, Giovanni de Gaetano, head of department\*\*\*§ and  
14 Licia Iacoviello, head of laboratory\*\*§ on behalf of the Moli-sani Project Investigators°  
15  
16  
17  
18  
19

20  
21  
22 \*Science Communication Unit, \*\*Laboratory of Genetic and Environmental Epidemiology,  
23

24 \*\*\*Research Laboratories, Fondazione di Ricerca e Cura “Giovanni Paolo II”, Largo Gemelli, 1  
25  
26 86100 Campobasso and §Epicomed Research, 86100 Campobasso, Italy  
27

28 °MOLI-SANI Project Investigators are listed in the Appendix 1 (Web only file)  
29  
30  
31  
32

33 **Keywords:** Obesity; Diet, Mediterranean; Social Class; Public Health; Cardiovascular Diseases  
34

35 **Word count:** 3,770  
36  
37  
38  
39

40 **Corresponding Author:**

41 Licia Iacoviello  
42 Laboratori di Ricerca  
43 Fondazione di Ricerca e Cura “Giovanni Paolo II”  
44 Largo Gemelli, 1  
45 86100 CAMPOBASSO, Italy  
46 Phone: +39 0874 312 274  
47 Fax: +39 0874 312 710  
48 E-mail: [licia.iacoviello@moli-sani.org](mailto:licia.iacoviello@moli-sani.org)  
49  
50  
51  
52  
53  
54  
55  
56  
57  
58  
59  
60

**ABSTRACT**

**Objectives:** ~~To assess differences in eating patterns among adult Italians with different socio-economic status, with particular focus on income.~~ To examine cross-sectional associations of socio-economic status (i.e., income and education) with adherence to a Mediterranean dietary pattern and obesity prevalence.

**Design:** Cross-sectional study on a sample of Italian subjects enrolled in the Moli-sani Project, a population-based cohort study.

The Italian EPIC food frequency questionnaire was used to determine food intake. Adherence to Mediterranean diet (MD) was appraised according to both the Mediterranean score elaborated by Trichopoulou (MDS) and the novel Italian Mediterranean Index (IMI) and to the *a posteriori* scores derived from principal component analysis. Four income categories were identified.

**Setting:** Molise region, Italy

**Participants:** 13,262 subjects (mean age 53±11, 50% men) out of 24,318 citizens (age ≥35) randomly enrolled in the Moli-sani Project.

**Main outcomes:** Dietary patterns and risk factors for cardiovascular disease.

**Results:** Household higher income ~~groups~~ were significantly associated with greater adherence to MD ( $p < .0001$ ) and to Olive oil and Vegetables dietary pattern in multivariable model including age, sex, daily energy intake, BMI, physical activity, smoking, alcohol consumption, education and marital status. The odds of having highest adherence to MD clearly increased according to income levels. People having the highest income had 546% (95% CI: 214% to 976%, MDS) or 6872% (95% CI: 343% to 112121%, IMI) higher probability to stick to a Mediterranean diet-like eating pattern than those in the lowest income group. Obesity prevalence was higher in the lowest-income group (36%) in comparison with the highest- income category (20%,  $p < .0001$ ). Income was associated with dietary patterns in all categories of education.

~~Similar results were found for high educated group.~~

1  
2  
3  
4 **Conclusions:** Higher income and education are [independently](#) associated with greater adherence to  
5  
6 Mediterranean diet-like eating patterns and lower prevalence of obesity. ~~The increasing prices of the~~  
7  
8 ~~basic Mediterranean food items seem to represent a real obstacle to healthy diet driving people to~~  
9  
10 ~~choose alternative ways of eating usually inspired by the need to save money in everyday life.~~  
11  
12  
13  
14  
15  
16  
17  
18  
19  
20  
21  
22  
23  
24  
25  
26  
27  
28  
29  
30  
31  
32  
33  
34  
35  
36  
37  
38  
39  
40  
41  
42  
43  
44  
45  
46  
47  
48  
49  
50  
51  
52  
53  
54  
55  
56  
57  
58  
59  
60



## INTRODUCTION

Mediterranean Diet (MD) has been shown to offer protection against cardiovascular disease, some types of cancer, and neurodegenerative diseases [in observational epidemiological studies](#) (1). The Lyon Diet Heart Study, by a randomised dietary intervention, also showed the health benefit of MD ~~editerranean~~ in secondary prevention (2,3). ~~And recently the UNESCO committee inscribed it on the list of Intangible Heritage (54).~~ The main food components of the MD are vegetables, fruits, cereals, fish, olive oil as main fat source and moderate red wine consumption. [Recently the UNESCO committee inscribed it on the list of Intangible Heritage](#) (4).

Despite the widely proven benefits of the diet discovered by Ancel Keys (5) in the Fifties, the Southern European countries in which Mediterranean diet originated are rapidly withdrawing from this eating pattern orienting their food choices toward products typical of the Western diet (WD) which is rich in refined grains, saturated fats, sugars, red and processed meat (6). The reasons why people keep on drifting from one dietary regimen to another remain open to several hypotheses (7). Social changes appear to have contributed to radical reversal in dietary habits in Western and Southern Europe societies although developing countries are slightly turning into westernized diets as well (8).

~~Increasing prices~~ [Prices of many of the basic food items](#) [The cost](#) of MD seem to have led people to give up this eating pattern in favour of less expensive products which allow to save money but are definitively unhealthy (9).

Many studies suggest that diet quality follows a socio-economic gradient highlighting how disadvantaged people present higher rates of obesity, diabetes, cardiovascular disease and some types of cancer (10).

The abandon of MD is also considered as a possible cause of the increasing obesity pandemic (11).

Several studies made a further step forward in order to see whether there is an association between

1  
2  
3  
4 diet cost and obesity, finding out that higher adherence to healthy dietary patterns is linked to higher  
5  
6 monetary costs and is inversely associated with BMI and obesity (12).  
7

8  
9 The aim of the present study was to ~~assess-examine cross-sectional associations of socio-economic~~  
10 ~~status (i.e., income and education) with adherence to a Mediterranean dietary pattern~~~~possible~~  
11 ~~differences in eating patterns among adult Italians with different socio-economic status, with~~  
12 ~~particular focus on low income, with the perspective that in order to reinforce the assumption that~~  
13 encouraging people to adopt healthy eating behaviours would not be just a matter of good willing  
14  
15 but mainly an issue ~~to develop which should lead to~~ concrete measures of intervention in terms of  
16 economic availability. ~~Moreover, Our-our~~ study ~~aimed also at evaluating~~~~investigated~~ a potential  
17 relationship between low-income, Mediterranean diet and obesity.  
18  
19  
20  
21  
22  
23  
24  
25  
26  
27  
28

## 29 MATERIAL AND METHODS

### 30 Study population

31  
32 The Moli-sani Project is a population-based cohort study which randomly recruited 24,325 citizens  
33 of the Molise, a region placed between Central and Southern Italy. Between March 2005 and April  
34 2010, the study enrolled men and women aged  $\geq 35$  years, randomly recruited from subjects  
35 included in the city-hall registries of Molise (13). Exclusion criteria were pregnancy, disturbances  
36 in understanding/ willing processes, ongoing poly-traumas or coma, refusal to sign the informed  
37 consent. The cohort will be followed-up for incident cardiovascular and tumor events.  
38  
39  
40  
41  
42  
43  
44  
45

46 After exclusion of subjects reporting personal history of cardiovascular disease (angina, myocardial  
47 infarction, heart failure, revascularization procedures and stroke) (5.7%), cancer (3.1%) or diabetes  
48 (6.0%) and of those for whom there were no information available on income (30.7%) mainly  
49 because they refused to answer or did not possess any reliable information on this issue, 13,262  
50 subjects were analysed. The latter were comparable with the whole Moli-sani Project population in  
51 terms of Mediterranean dietary patterns and socio-economic features, whereas mean age of the  
52  
53  
54  
55  
56  
57  
58  
59  
60

1  
2  
3  
4 sample was slightly lower ( $53.3 \pm 11$  vs  $55.0 \pm 12$ ) and had a higher prevalence of men (50% vs  
5  
6 48%) compared with the whole population sample.  
7  
8  
9

### 10 **Dietary information**

11 The validated Italian EPIC food frequency questionnaire was used to evaluate food intake (14, 15).  
12 The questionnaire, computerized with tailor-made software, allowed to interview participants in an  
13 interactive way, including illustrations of sample dishes of definite sizes or by reference to standard  
14 portion sizes. To simplify interpretation of data and to minimize within-person variations in intakes  
15 of individual foods, 188 food items were classified into 45 predefined food groups on the basis of  
16 similar nutrient characteristics or culinary usage (Appendix 2). (Web only file).  
17  
18  
19  
20  
21  
22  
23  
24

25 Moderate alcohol intake was defined as regularly drinking less than two or one drinks a day, by  
26 men and women, respectively.  
27  
28  
29

30 Food consumption patterns were generated by using Principal Components Analysis (PCA)  
31 conducted on the correlation matrix of 45 food groups (16). Three main factors emerged, in  
32 agreement with previous findings in the same population (16). The first pattern, identified as  
33 “Olive Oil and Vegetables”, was characterized by high positive loadings for olive oil, vegetables,  
34 legumes, soups, fruits and fish. The second pattern, named “Pasta and Meat”, was characterized by  
35 high positive loadings for pasta, cooked tomatoes, red meat, animal fats and alcoholic beverages,  
36 and negative loadings of breakfast cereals and yogurt. The “Eggs and Sweets” pattern was  
37 characterized by high positive loadings for eggs, margarines, processed meat and sugar and sweets.  
38  
39  
40  
41  
42  
43  
44  
45  
46  
47

48 We evaluated the adherence to the Mediterranean diet by using the Mediterranean Diet Score  
49 (MDS) elaborated by Trichopoulou et al (17). Scoring was based on the intake of the following 9  
50 items: vegetables, legumes, fruit and nuts, dairy products, cereals, meat and meat products, fish,  
51 alcohol, and the ratio of monounsaturated:saturated fat. For most items, consumption above the  
52 study median received 1 point; all other intakes received 0 points. For dairy products, meat and  
53  
54  
55  
56  
57  
58  
59  
60

1  
2  
3  
4 meat products, consumption below the median received 1 point. Medians are gender specific. For  
5  
6 ethanol, men who consumed 10–50 gr/day and women who consumed 5–25 gr/day received 1  
7  
8 point; otherwise, the score was 0. The range of possible scores ranged between was 0 and to 9, which  
9  
10 is obtained by assigning a value of 0 or 1 to each of 9 indicated components (vegetables, legumes,  
11  
12 fruits, cereals, fish, meat, dietary products, ethanol, lipids) with the use of the sex-specific median  
13  
14 as cut-off. The total Mediterranean diet score ranged from 0, which indicates the minimal  
15  
16 adherence to the traditional Mediterranean diet, to 9, the latter reflecting namely the maximal  
17  
18  
19  
20 adherence.

21  
22 We also used a new Italian Mediterranean Index (IMI) whose score is based on the intake of 11  
23  
24 items (pasta, vegetables, fruits, legumes, olive oil, fish, soft drinks, butter, red meat, and potatoes,  
25  
26 alcohol) ranged from 0 to 11 (15). is based on the intake of 11 items: high intakes of 6 typical  
27  
28 Mediterranean foods (pasta; typical Mediterranean vegetables such as raw tomatoes, leafy  
29  
30 vegetables, onion, and garlic, salad, and fruiting vegetables; fruit; legumes; olive oil; and fish); low  
31  
32 intakes of 4 non-Mediterranean foods (soft drinks, butter, red meat, and potatoes); and alcohol  
33  
34 consumption. If consumption of typical Mediterranean foods was in the 3rd tertile of the  
35  
36 distribution, the person received 1 point; all other intakes received 0 points. If consumption of non-  
37  
38 Mediterranean foods was in the first tertile of the distribution, the person received 1 point. Ethanol  
39  
40 received 1 point for intake up to 12 gr/day; abstainers and persons who consumed >12 gr/day  
41  
42 received 0 points. Possible scores ranged from 0 to 11(18). Such Italian Index was conceived to  
43  
44  
45  
46 better capture healthy eating including foods, such as pasta, more typically available in Italy.  
47  
48

### 50 51 **Data collection**

52  
53 Body Mass Index (BMI) was calculated as  $\text{kg/m}^2$ . Waist circumferences were measured according  
54  
55 to the NIH, Heart, Lung, and Blood guidelines (19). Blood pressure was measured by an automatic  
56  
57 device (OMRON-HEM-705CP) three times on the non-dominant arm, with the patient lying down  
58  
59  
60

1  
2  
3  
4 for about 5 minutes. Hypertension was defined as systolic BP $\geq$ 160 mm Hg and/or diastolic BP $\geq$ 95  
5  
6 mm Hg, or using pharmacological treatment. Physical activity was assessed by a structured  
7  
8 questionnaire (24 questions on working and leisure time and sport participation) and expressed as  
9  
10 daily energy expenditure in metabolic equivalent task-hours (MET/d).

11  
12 Serum lipids and glucose were assayed by enzymatic reaction methods using an automatic analyzer  
13 (ILab 350, Instrumentation Laboratory (IL), Milan, Italy). LDL-cholesterol was calculated  
14  
15 according to Friedewald. High sensitivity C reactive protein (CRP) was measured in fresh serum, by  
16  
17 a latex particle-enhanced immunoturbidimetric assay (IL Coagulation Systems on ACL9000). Inter-  
18  
19 and intra-day CV were 5.5% and 4.17%, respectively.  
20  
21  
22  
23  
24  
25

### 26 **Socio-economic variables**

27  
28 Individual Household net H income categories were considered as low (<10,000 euro/ yeargro), low-  
29  
30 medium (>10,000 <25,000 euro/year), medium – high (>25,000< 40,000 euro/year), high (>40,000  
31  
32 euro/year).  
33  
34

35 Education Level was divided into three categories: <8 (low) years of studies (0 point), >8 -and  
36  
37 <=8-13(medium) -yearsand -of studies (1 point)>13- (high) years of studies.  
38  
39

40 Socio-economic status (SES) was expressed as a score based on 5 variables: dwelling ownership  
41  
42 and ratio between the number of living-in family members and number of rooms (People Room  
43  
44 Density ), both currently and at childhood - and availability of hot water at home at childhood. The  
45  
46 five components were dichotomized according to the median value, and a score of one was  
47  
48 attributed to the category supposed to be marker of higher social status in comparison with the  
49  
50 opposite category: thus we assigned a score of 1 to people living in a house with living-in family  
51  
52 members/room density > 0.6 or dwelling ownership or with availability of hot water and a score 0  
53  
54 to people with living-in family members/room density $\leq$ 0.6, no dwelling ownership or with  
55  
56  
57  
58  
59  
60

1  
2  
3  
4 unavailability of hot water. [The SES score did not include income and education. Marital status was](#)  
5  
6 [considered as married or live-in partner vs others \(divorced, unmarried, widower\).](#)

7  
8 [Education Level was divided in two categories: ≤8 years of studies \(0 point\) and >8 years of](#)  
9  
10 [studies \(1 point\).](#)

## 15 **Statistical analysis**

16  
17 Values for continuous variables are means ± Standard Deviation. CRP was transformed into natural  
18  
19 logarithm to reduce positive skewness, but data were reported untransformed for clarity. Analysis of  
20  
21 variance for continuous or categorical variables was applied to test the associations in Table 1.

22  
23  
24 Multivariable analysis of variance [with appropriate terms for interaction](#) was used for testing the  
25  
26 association of adherence to MD scores, dietary patterns or dietary variables (considered as the  
27  
28 dependent variables) with categories of income or SES components. By using multivariable logistic  
29  
30 regression analysis [\(with appropriate terms for interaction\)](#), odds ratio (ORs) with corresponding  
31  
32 95% confidence intervals (95% CI) were calculated to quantify the association of income or  
33  
34 education levels -with adherence to MD-like eating scores [or obesity](#). High adherence to MD, as  
35  
36 stated by the Medscore, was defined when the score was ≥6 points whereas a low adherence when  
37  
38 the score was ≤3 points. Subjects with intermediate values (4 or 5 points) were excluded from this  
39  
40 analysis in order to focus on the two extreme categories of adherence. The same was done for the  
41  
42 IMI score, but the cut-off was ≥5 for the higher adherence or ≤3 for the lower adherence category.  
43  
44  
45  
46 The data analysis was generated using SAS/STAT software, Version 9.1.3 of the SAS System for  
47  
48 Windows©2009. SAS Institute Inc. and SAS are registered trademarks of SAS Institute Inc., Cary,  
49  
50 NC, USA.

## 55 **RESULTS**

### 57 **Income groups**

1  
2  
3  
4 Table 1 shows the characteristics of the whole population by income categories. People in the  
5  
6 uppermost income group were 53.5% men and showed a better health profile, having significantly  
7  
8 lower values of BMI, systolic blood pressure, C-reactive protein, triglycerides and blood glucose.  
9  
10 Obesity prevalence (BMI > 30 Kg/m<sup>2</sup>) differed according to income; it was higher in the lowest-  
11  
12 income group (36%) and lower in the highest- income category (20%, p <.0001 Tab. 1).

13  
14  
15 In Table 2 the association among income levels, dietary habits and single food groups are reported.

16  
17 ~~Subjects in the lower income categories showed poor adherence to the Olive oil and Vegetables~~  
18 ~~dietary pattern (p<.0001) whereas a greater adherence to the Western type pattern (Dietary pattern~~  
19 ~~3) was observed.~~

20  
21  
22  
23  
24 Higher income groups were significantly associated with greater adherence to both score indexes,  
25  
26 namely MDS (p<.0001) and IMI (p<.0001) in the model adjusted for age, sex, daily energy intake,  
27

28  
29 BMI, physical activity, smoking, alcohol consumption and marital status.

30  
31 ~~Similar data were obtained after stratification by gender (p for interaction=0.24 for MDS and p for~~  
32 ~~interaction =0.41 for IMI) and age (-p for interaction=0.43 for IMI). However, the increasing~~  
33 ~~adherence to MD according to income was more pronounced in the elderly when it was measured as~~  
34 ~~MSD (p for interaction=0.0002 ;  $\beta = 0.063$ , SE±0.021, p=0.0028 for people ≤ 65 years and  $\beta =$~~   
35 ~~0.17, SE±0.051, p =0.0008, for people > 65 years).~~

36  
37  
38  
39  
40  
41  
42 ~~Subjects in the lower income categories showed poor adherence to the Olive oil and Vegetables~~  
43 ~~dietary pattern (p<.0001) whereas a greater adherence to the Western type pattern (Dietary pattern~~  
44 ~~3) was observed. Similar results were observed after stratification for gender and age (data not~~  
45  
46  
47 ~~shown).~~

48  
49  
50  
51  
52  
53 In addition, analysis of single foods consumption by income categories showed that people with the  
54  
55 higher income reported higher intake of the basic components of the MD, that is fish, fruits,  
56  
57  
58  
59  
60

legumes and reduced consumption of animal fats, processed meat and white meat whose frequent consumption is more typical of a Western dietary model.

The odds of having highest adherence to the MD, that raised with both MDS and IMI scores, clearly increased according to income levels (Tab. 34). People having the highest income had 546% (MDS) or 7268% (IMI) statistically significant higher probability to stick to a MD-like eating pattern than those in the lowest income group (Tab. 34).

Regarding alcohol consumption (Tab.2), the highest income group appeared to include the highest prevalence of moderate drinkers (41.7% versus 27.5% recorded in the lowest income group) as already found on a sample of Danish population (17).

### Socio-economic status and education

Income fairly correlated with SES (Spearman correlation coefficients = 0.24,  $p < 0.0001$ ) and education ( $r = 0.51$ ,  $p < 0.0001$ ) whereas correlation between SES and education was  $r = 0.34$ ,  $p < 0.0001$ .

Education was positively associated with adherence to MD, measured by both MDS ( $p = 0.034$ ) and IMI ( $p = 0.0014$ ), while SES was not ( $p = 0.19$  for MDS and  $p = 0.78$  for IMI) in the fully adjusted model also including education and income.

Odds of having higher adherence according to education levels were 1.26 and 1.27 ( $p$  for trend = 0.0020) for MDS and 1.16 and 1.33 ( $p$  for trend = 0.0009) for IMI (Tab.4).

### Stratification by education

As less educated people may show lower adherence because of lack of knowledge about healthy habits (2118), we performed additional analyses -stratified for educational level.

Both Either in lower ( $\leq 8$ ), higher-medium ( $> 8$  and  $\leq 13$  years of studies) and higher ( $> 13$  years of studies) lower ( $\leq 8$ )-educated groups adherence to Mediterranean diet (evaluated both by IMI



1  
2  
3  
4 and MDS score) followed the gradient of income categories (Tab. 45), with the exception of the  
5  
6 whereas the trend appears not significant in the uppermost educated group, at least for what  
7  
8 concerns when the MDS score was used (p=0,067). However the interaction test was not significant  
9  
10 for either scores. Accordingly, education was related to dietary pattern independently from income.

11  
12  
13 Indeed, by dividing income levels into two main categories (low and low-medium VS high and  
14 high-medium), in the fully adjusted model, education was positively associated with dietary patterns  
15 both in the lowest (MDS: p=0.032 and IMI: p=0.0025) and in the highest income group (MDS:  
16 p=0.0067 and IMI: p=0.0010 ).

### 23 Income/education, Mediterranean diet and obesity

24  
25 Finally, we evaluated the association of income and education on diet quality and then on obesity in  
26  
27 a unique statistical model. Odds ratio of having obesity decreased according to income (OR=0.72,  
28  
29 95%CI: 0.59 to 0.86 for highest versus lowest income group) -and education level (OR=0.53,  
30  
31 95%CI: 0.45 to 0.61 for highest versus lowest education level).- These odds ratios remained  
32  
33 unchanged when in the model diet quality (measured as Mediterranean scores) was included.  
34  
35 Moreover,- the association between income or education with obesity was equally observed in both  
36  
37 highest and lowest MD adherence categories as defined in Table 3 (the four terms for interactions  
38  
39 among income or education with MDS or IMI were all p>0.35).  
40  
41  
42  
43  
44  
45

## 46 **DISCUSSION**

47  
48 People with higher income and higher levels of education had a greater adherence to MD-like  
49 eating patterns, as measured by three different parameters: two *a priori* Mediterranean scores (the  
50 traditional one introduced by Trichopoulou and a more recent Italian Mediterranean index), and the  
51 *a posteriori* dietary patterns derived from principal components analysis. Evidence on the health  
52 benefits of the MD is based on several studies and meta-analyses (1,7,21). However, adherence to  
53  
54  
55  
56  
57  
58  
59  
60

1  
2  
3  
4 this healthy eating pattern is rapidly disappearing in the countries of Southern Europe where it  
5  
6 originated and persisted during centuries, including the areas of Northern Africa in which there is an  
7  
8 increasing prevalence of metabolic disorders and consequent cardiovascular disease mainly due to  
9  
10 the changing in lifestyle habits (22). Socio-economic status has been included among the factors  
11  
12 related to chronic disease onset, and disparities in dietary habits by social class have been advocated  
13  
14 to explain at least in part the higher CVD risk factors profile observed among low SES groups (23).  
15  
16 Our results agree with the conclusions reported in the review by Darmon et al. (10) that higher-  
17  
18 quality diets are mainly consumed by better educated and more affluent people while lower socio-  
19  
20 economic groups tend to have lower quality diets thus exposing themselves to a higher risk to  
21  
22 develop diet-related diseases. Similar conclusions were reached by other investigations too (24)  
23  
24 suggesting that low socio-economic groups end with having poorer diets. These findings are  
25  
26 supported, at least in part, by the increasing prices of some of the key foods of the MD fact that  
27  
28 following a Mediterranean dietary style could represent a matter of money (9). Indeed researchers  
29  
30 in Spain showed that MD is definitely more expensive to follow than Western dietary patterns: this  
31  
32 may represent a strong economic obstacle when counselling people about the opportunity to follow  
33  
34 a healthy diet because cost may become a prohibitive factor (9). Aggrawal et al. (25) demonstrated  
35  
36 that the well-known socio-economic disparities in diet quality is mediated by food cost confirming  
37  
38 that lower SES groups tend to consume more energy dense and nutrient poor diets. However, the  
39  
40 economic advantages of a Mediterranean way of eating in terms of cost-effectiveness should be  
41  
42 highlighted as shown in patients with previous CVD, that could represent an exceptional return on  
43  
44 investment (26).

45  
46  
47  
48  
49  
50  
51 Subjects with lower income had a greater prevalence of obesity too. The association between  
52  
53 obesity and socioeconomic factors has been previously observed (27) suggesting that the latter -play  
54  
55 an important role in the risk of obesity and overweight not only in adults but also in children (28).  
56  
57 However our data show that the strong association observed between lower income or education  
58  
59  
60

1  
2  
3  
4 with obesity -was not -mediated by -diet quality. Indeed, an additional analysis combinige the  
5  
6 impacts of education or income on diet quality and then on obesity in a unique statistical model.  
7  
8 showed that both the association remained unchanged when in the model diet quality was included.  
9  
10 According to these results, the changes in obesity rates observed in the different income and  
11 education categories appear not necessarily re-mediated by diet quality. However, the  
12  
13 epidemiological evidence supporting a causal link between Mediterranean diets and body weight is  
14  
15 contrasting (29).  
16  
17  
18  
19

20  
21 It is quite clear that accumulating proofs on the benefits of Mediterranean- like diets is an  
22 insufficient could no longer be the only task of prevention strategyyies as which should also try to  
23 set the conditions allowing people to stick to healthier dietary habits should also be clearly  
24 identified.  
25  
26  
27  
28  
29

30  
31 This study contributes to provide further evidence to the assumption that dietary habits are strongly  
32 influenced by socio-economic factors, in particular by income which appears to play an important  
33 role in determining people's eating choices (30). As far as education is concerned, previous studies  
34 found a relationship between higher levels of education and healthy diets (31). In our research,  
35 education resulted to be independently associated to MD and did not modify the association  
36 between income levels and healthy dietary pattern as shown in the stratified analysis by education  
37 levels.  
38  
39  
40  
41  
42  
43  
44

45  
46 The promotion of healthy lifestyles and diets to prevent weight gain and related diseases has  
47 jumped to the top of the priority list of the public health experts all over the world since obesity has  
48 become a threatening epidemic. So far the traditional MD has proven to be an effective "remedy"  
49 to the spreading of the major chronic disease, obesity and mortality. Our study highlights the strong  
50 linkage among low income, poor adherence to MD and consequent obesity prevalence.  
51  
52  
53  
54  
55  
56  
57  
58  
59  
60

1  
2  
3  
4 We started our study wondering about what makes so hard for people to choose healthy food  
5 instead of bad products, putting at risk their own health. We excluded it could be just a matter of  
6 personal choice or taste, neither an issue related to the lack of knowledge about the healthy benefits  
7 of MD worldwide recognized and also well disseminated in the lay press.  
8  
9  
10  
11  
12

### 13 14 15 **Limitations of this study**

16  
17 A major limitation of the present study is that people self-reported their own income which is a  
18 quite sensitive issue. Indeed we recorded a high percentage (30.7%) of non-respondent subjects  
19 who refused to declare or did not know their ~~personal~~ family income. Yet such large non-  
20 respondent group is very common in this type of investigation, especially among women and  
21 elderly (32) However, there was no difference between the whole Moli-sani population and the  
22 subsample analyzed here as far as dietary habits and socio-economic variables were concerned.  
23  
24  
25  
26  
27  
28

29  
30 Another inherent limit is represented -by the cross-sectional nature of our study.  
31  
32

33 In addition, caution is needed in extending the results presented here to larger contexts since data  
34 were collected in a region located between Central and Southern Italy, Mediterranean by tradition  
35 and culture (13). Yet, the main characteristics of our population sample are comparable to those of  
36 the Italian Cardiovascular Epidemiological Observatory (33), a large survey including random  
37 samples of the general population recruited all over Italy; therefore our sample can be considered  
38 representative at least of the whole Italian population.  
39  
40  
41  
42  
43  
44  
45  
46  
47  
48

### 49 **Strengths of this study**

50  
51 Our very large population sample is made of subjects coming from a quite homogenous  
52 environment with no marked differences in terms of socioeconomic disparities, differently from  
53 metropolitan areas, where previous studies found huge gaps among social classes and related health  
54 status at relatively small distances from the city centre (34). Bearing this in mind, the differences we  
55  
56  
57  
58  
59  
60

1  
2  
3  
4 observed in the adherence to Mediterranean diet according to income indicate that also in a  
5  
6 environment homogeneous both for genetic and lifestyles, income and education can still play a role  
7  
8 in influencing dietary choices. Furthermore, diet quality showed a continued improvement across a  
9  
10 relatively small range of economic strata. Our “poorest” are represented by people earning less than  
11  
12 10,000 euro/net per year whilst the “richest” group is made of subjects with more than 40,000  
13  
14 euro/net per year. Such differences among income classes are quite restrained and recall what  
15  
16 already said for the pretty homogeneous environment where our sample comes from. We are not  
17  
18 dealing with real huge socioeconomic and income differences. Despite this homogeneity, we did  
19  
20 observe notable changes in diet quality among different groups.  
21  
22

23  
24 The differences observed across the income strata would likely become even more evident in MD  
25  
26 importing countries where getting typical Mediterranean products is more difficult and expensive.

27  
28 In addition, apparently for the first time this topic was addressed by using two *a priori*

29  
30 Mediterranean scores (the traditional one introduced by Trichopoulou and a novel Italian

31  
32 Mediterranean index), and the *a posteriori* dietary patterns derived from principal components

33  
34 analysis. This leads to overcome the limitations each of these approaches may present. Indeed, the  
35  
36 “a priori” scores only reflect some aspects of diet and do not account for correlations between score  
37  
38 components. Instead, the “a posteriori” approaches have the weakness of low reproducibility, ÷  
39  
40 different populations havinge different non-predefined dietary patterns. Therefore, the use of an  
41  
42 index based on the foods actually available to Italians and traditional Italian cooking styles should  
43  
44 improve the ability of the index to classify the Italian cohort.  
45  
46  
47  
48  
49  
50  
51  
52

## 53 54 CONCLUSIONS

55  
56 Our data suggest consistent associations of income and education with dietary patterns clearly  
57  
58 indicate that eating “mediterraneanly” is also, if not mainly, a matter of and may foster offer  
59  
60

1  
2  
3  
4 | discussion on healthy food accessibility in terms of economic costs. The cost of increasing prices  
5  
6 | of the basic MD seem to represent a real obstacle to healthy diet driving people to choose  
7  
8 | alternative ways of eating usually inspired by the need to save money in everyday life. Public  
9  
10 | health policies shall take into account the fact that correct dietary habits need to be promoted by  
11  
12 | allowing people to choose the best for their own health. It is definitely an interdisciplinary issue  
13  
14 | which shall call to action every single actor of modern societies otherwise condemned to increase  
15  
16 | their already heavy burden of chronic diseases. As already noted by others -who dealt with this topic  
17  
18 | (10), the promotion of high-cost foods to low-income people without taking food costs into account  
19  
20 | is not likely to be successful.  
21  
22  
23  
24  
25  
26  
27  
28  
29  
30  
31  
32  
33  
34  
35  
36  
37  
38  
39  
40  
41  
42  
43  
44  
45  
46  
47  
48  
49  
50  
51  
52  
53  
54  
55  
56  
57  
58  
59  
60

Table 1 Characteristics of the whole population as a whole and according to four income categories

|                                      | Income Categories    |                             |                                         |                                        |                                | P value*    |
|--------------------------------------|----------------------|-----------------------------|-----------------------------------------|----------------------------------------|--------------------------------|-------------|
|                                      | All<br>(n=13,262)    | < 10,000<br>(n = 980, 7.4%) | > 10,000 < 25,000<br>(n = 5,751, 43.4%) | > 25,000 < 40,000<br>(n= 4,120, 31.1%) | > 40,000<br>(n = 2,411, 18.2%) |             |
| Age (years)                          | 53.3 (10.6)          | 60.1 (12.7)                 | 54.0 (11.2)                             | 51.4 (9.5)                             | 52.3 (8.8)                     | <.0001      |
| Sex (males, n, %)                    | 6,590 (49.7%)        | 348 (35.5%)                 | 2,834 (49.3%)                           | 2,117 (51.4%)                          | 1,291 (53.5%)                  | <.0001      |
| BMI (kg/m <sup>2</sup> )             | 27.7 (4.6)           | 28.7 (5.3)                  | 28.2 (4.7)                              | 27.3 (4.3)                             | 27.0 (4.0)                     | <.0001      |
| WH-ratio                             | 0.91 (0.07)          | 0.92 (0.079)                | 0.91 (0.075)                            | 0.91 (0.075)                           | 0.91 (0.074)                   | 0.019       |
| Systolic blood pressure ( mmHg)      | 139.0 (20.1)         | 143.4 (21.0)                | 140.1 (20.4)                            | 137.3 (19.6)                           | 137.4 (19.2)                   | 0.0053      |
| Diastolic blood pressure ( mmHg)     | 82.7 (9.6)           | 81.7 (9.7)                  | 82.8 (9.4)                              | 82.7 (9.7)                             | 82.8 (10.0)                    | 0.0038      |
| Total physical activity (MET-h /day) | 43.4 (8.7)           | 44.8 (10.4)                 | 45.0 (9.7)                              | 42.5 (7.9)                             | 40.4 (5.2)                     | <.0001      |
| Leisure time PA ( MET-h /day )       | 2.18 (1.88)          | 1.81 (1.67)                 | 2.10 (1.78)                             | 2.22 (1.96)                            | 2.28 (1.94)                    | 0.20        |
| Working PA ( MET-h /day )            | 14.6 (12.2)          | 22.4 (19.1)                 | 18.8 (14.3)                             | 12.7 (10.4)                            | 10.2 (6.4)                     | <.0001      |
| Smokers n, %                         |                      |                             |                                         |                                        |                                |             |
| <i>Never</i>                         | 6,370 (48.1%)        | 558 (56.9%)                 | 2,838 (49.4%)                           | 1,901 (46.2%)                          | 1,073 (44.5%)                  | <.0001      |
| <i>Current</i>                       | 3,296 (25.0%)        | 222 (22.6%)                 | 1,418 (24.7%)                           | 1,060 (25.8%)                          | 596 (24.7%)                    |             |
| <i>Former</i>                        | 3,585 (27.5%)        | 200 (20.4%)                 | 1,490 (25.9%)                           | 1,154 (28.0%)                          | 741 (30.7%)                    |             |
| Total cholesterol ( mg/dL)           | 212.3 (40.2)         | 214.3 (41.9)                | 212.8 (40.4)                            | 211.8 (40.4)                           | 211.0 (38.7)                   | 0.64        |
| HDL ( mg/dL)                         | 57.0 (14.5)          | 58.4 (14.4)                 | 57.2 (14.4)                             | 56.6 (14.5)                            | 56.8 (14.6)                    | 0.35        |
| LDL ( mg/dL)                         | 130.3 (33.6)         | 130.8 (35.7)                | 130.3 (33.8)                            | 130.2 (33.6)                           | 130.1 (32.7)                   | 0.65        |
| CRP ( mg/dL)                         | 2.4 (3.0)            | 3.0 (3.7)                   | 2.6 (3.1)                               | 2.2 (2.9)                              | 2.1 (2.7)                      | <.0001      |
| Triglycerides ( mg/dL)               | 127.0 (83.8)         | 129.1 (87.0)                | 129.1 (84.5)                            | 126.1 (85.0)                           | 122.6 (78.4)                   | 0.0002      |
| Blood glucose ( mg/dL)               | 96.8 (17.0)          | 97.7 (20.4)                 | 97.2 (16.8)                             | 96.4 (16.5)                            | 96.4 (16.4)                    | 0.17        |
| Obesity (n, %)                       | 3,563 (26.9%)        | 352 (36.0%)                 | 1,733 (30.1%)                           | 988 (24.0%)                            | 490 (20.3%)                    | <.0001      |
| <b>Hypertension (n, %)</b>           | <b>4,469 (33.7%)</b> | <b>452 (46.2%)</b>          | <b>2,006 (34.9%)</b>                    | <b>1,259 (30.6%)</b>                   | <b>752 (31.2%)</b>             | <b>0.79</b> |

\* P value adjusted for sex, age, energy intake [and marital status](#)

Table 2 Mediterranean diet adherence and dietary consumption **as a whole and according to four income categories**

## Income categories

|                                                 | All<br>(n=13,262) | < 10,000<br>(n = 980, 7.4%) | > 10,000 < 25,000<br>(n = 5,751, 43.4%) | > 25,000 < 40,000<br>(n= 4,120, 31.1%) | > 40,000<br>(n = 2,411, 18.2%) | P value * |
|-------------------------------------------------|-------------------|-----------------------------|-----------------------------------------|----------------------------------------|--------------------------------|-----------|
| Mediterranean score (MDS)                       | 4.44 (1.64)       | 4.32 (1.61)                 | 4.40 (1.62)                             | 4.46 (1.62)                            | 4.53 (1.70)                    | <.0001    |
| Italian Mediterranean index (IMI)               | 3.26 (1.71)       | 3.20 (1.64)                 | 3.15 (1.68)                             | 3.30 (1.71)                            | 3.49 (1.79)                    | <.0001    |
| Dietary Pattern 1<br>(Olive Oil and Vegetables) | 0.042 (0.95)      | -0.066 (0.92)               | 0.021 (0.94)                            | 0.070 (0.95)                           | 0.091 (0.97)                   | <.0001    |
| Dietary Pattern 2<br>(Pasta and Meat)           | 0.036 (0.95)      | 0.0078 (0.91)               | 0.093 (0.95)                            | 0.0053 (0.95)                          | - 0.036 (0.97)                 | <.0001    |
| Dietary Pattern 3<br>(Eggs and sweets)          | 0.015 (0.85)      | -0.13 (0.88)                | 0.040 (0.86)                            | 0.044 (0.85)                           | -0.033 (0.82)                  | <.0001    |
| Energy intake (kcal/day)                        | 2177.4 (640.7)    | 2,062.5 (704.1)             | 2,186.3 (649.0)                         | 2,190.6 (627.8)                        | 2,180.4 (610.7)                | 0.5058    |
| Alcohol intake (gr/day)                         | 16.5 (22.4)       | 16.1 (25.8)                 | 18.2 (24.5)                             | 15.3 (20.3)                            | 14.9 (18.6)                    | <.0001    |
| Moderate drinkers (n, %)                        | 4,303 (33.3%)     | 261 (27.5%)                 | 1,646 (29.2%)                           | 1,419 (35.3%)                          | 977 (41.7%)                    | <.0001    |
| Wine consumption (ml/day)                       | 135.5 (188.7)     | 133.3 (209.6)               | 148.9 (203.7)                           | 125.5 (175.4)                          | 121.8 (160.4)                  | <.0001    |
| Olive oil (gr/day)                              | 24.2 (9.2)        | 22.9 (9.0)                  | 24.4 (9.3)                              | 24.4 (9.2)                             | 24.0 (9.1)                     | 0.0034    |
| Animal fat (gr/day)                             | 1.26 (1.41)       | 1.21 (1.37)                 | 1.34 (1.45)                             | 1.25 (1.41)                            | 1.11 (1.31)                    | <.0001    |
| Fish (gr/day)                                   | 20.9 (17.0)       | 17.5 (15.5)                 | 19.4 (16.3)                             | 22.1 (17.4)                            | 23.9 (18.0)                    | <.0001    |
| Processed meat (gr/day)                         | 30.4 (20.9)       | 27.4 (20.0)                 | 31.5 (21.8)                             | 30.7 (20.5)                            | 28.6 (19.9)                    | <.0001    |
| Cooked vegetables (gr/day)                      | 73.5 (43.4)       | 71.2 (42.8)                 | 74.8 (44.0)                             | 74.0 (42.5)                            | 70.6 (43.4)                    | 0.0006    |
| Legumes (gr/day)                                | 28.3 (22.1)       | 27.1 (20.3)                 | 27.1 (21.6)                             | 28.4 (21.9)                            | 31.3 (24.2)                    | <.0001    |
| Nuts and seeds (gr/day)                         | 0.89 (2.3)        | 0.90 (3.2)                  | 0.87 (2.3)                              | 0.88 (2.1)                             | 0.94 (2.2)                     | 0.34      |
| Red meat (gr/day)                               | 47.8 (26.0)       | 44.7 (26.3)                 | 48.8 (25.9)                             | 47.9 (25.8)                            | 46.8 (26.3)                    | 0.0008    |
| White meat (gr/day)                             | 26.4 (18.8)       | 29.6 (19.8)                 | 28.1 (19.3)                             | 25.3 (17.8)                            | 23.2 (18.1)                    | <.0001    |
| Fruits (gr/day)                                 | 358.5 (204.3)     | 362.7 (211.1)               | 354.9 (201.2)                           | 355.7 (198.9)                          | 370.3 (217.0)                  | 0.015     |
| Crustaceans, molluscs, seafood (gr/day)         | 11.0 (10.1)       | 8.9 (8.8)                   | 10.7 (9.9)                              | 11.7 (10.7)                            | 11.5 (10.0)                    | <.0001    |
| Vegetable oils (no olive; gr/day)               | 0.28 (0.81)       | 0.33 (1.23)                 | 0.29 (0.79)                             | 0.28 (0.69)                            | 0.27 (0.84)                    | 0.18      |
| Refined grains (pasta and bread; (gr/day)       | 198.3 (101.9)     | 193.5 (104.5)               | 201.3 (103.3)                           | 196.3 (99.2)                           | 196.8 (101.9)                  | 0.0004    |
| Sugar (gr/day)                                  | 11.0 (10.4)       | 10.3 (9.7)                  | 11.2 (10.9)                             | 11.1 (10.3)                            | 10.4 (9.8)                     | <.0001    |

\*P value adjusted for sex, age, energy intake, BMI, physical activity, smoking, alcohol consumption, marital status



**Table 3 Odds ratios of having high adherence to Mediterranean diet according to income, education and socioeconomic status**

|                             | Mediterranean score  |                   |      |             | Italian Mediterranean Index |                  |      |             |
|-----------------------------|----------------------|-------------------|------|-------------|-----------------------------|------------------|------|-------------|
|                             | Low<br>(n=3,843)     | High<br>(n=3,518) | OR   | (95%CI)     | Low<br>(n=4704)             | High<br>(n=3089) | OR   | (95%CI)     |
| <b>Income</b>               |                      |                   |      |             |                             |                  |      |             |
| < 10,000                    | 310 (8.1%)           | 231 (6.6%)        | -1-  | (referent)  | 353 (7.5%)                  | 209 (6.8%)       | -1-  | (referent)  |
| > 10,000 < 25,000           | 1,694 (44.1%)        | 1,470 (41.8%)     | 1.28 | (1.04-1.57) | 2,161 (45.9%)               | 1,201 (38.9%)    | 1.07 | (0.87-1.32) |
| > 25,000 < 40,000           | 1,153 (30.0%)        | 1,116 (31.7%)     | 1.51 | (1.21-1.88) | 1,436 (30.5%)               | 995 (32.2%)      | 1.34 | (1.07-1.69) |
| > 40,000                    | 686 (17.9%)          | 701 (19.9%)       | 1.54 | (1.21-1.97) | 754 (16.0%)                 | 684 (22.1%)      | 1.72 | (1.34-2.21) |
|                             | (p for trend=0.0002) |                   |      |             | (p for trend<.0001)         |                  |      |             |
| <b>Education level</b>      |                      |                   |      |             |                             |                  |      |             |
| Low                         | 1,775 (46.2%)        | 1,571 (44.7%)     | -1-  | (referent)  | 2,250 (47.8%)               | 1,307 (42.3%)    | -1-  | (referent)  |
| Medium                      | 1,504 (39.1%)        | 1,421 (40.4%)     | 1.26 | (1.11-1.43) | 1,860 (39.6%)               | 1,283 (41.5%)    | 1.16 | (1.02-1.31) |
| High                        | 564 (14.7%)          | 525 (14.9)        | 1.27 | (1.06-1.52) | 592 (12.6%)                 | 499 (16.1%)      | 1.33 | (1.11-1.60) |
|                             | (p for trend=0.0020) |                   |      |             | (p for trend=0.0009)        |                  |      |             |
| <b>Socioeconomic status</b> |                      |                   |      |             |                             |                  |      |             |
| Low                         | 1,097 (29.1%)        | 1,097 (32.2%)     | -1-  | (referent)  | 1,462 (32.2%)               | 927 (30.9%)      | -1-  | (referent)  |
| Medium                      | 1,155 (31.1%)        | 1,095 (32.1%)     | 0.94 | (0.83-1.07) | 1,414 (31.1%)               | 930 (31.0%)      | 1.00 | (0.88-1.14) |
| High                        | 1,475 (39.8%)        | 1,218 (35.7%)     | 0.88 | (0.77-1.00) | 1,664 (36.7%)               | 1,144 (38.1%)    | 0.98 | (0.86-1.12) |
|                             | (p for trend=0.054)  |                   |      |             | (p for trend=0.82)          |                  |      |             |

The logistic model included income, education, socioeconomic status and sex, age, energy intake, BMI, physical activity, smoking, alcohol consumption, marital status

**Table 4 Mediterranean diet adherence according to four income levels and stratified by education**

|                             | Income Categories |                   |                   |                  | P value * |
|-----------------------------|-------------------|-------------------|-------------------|------------------|-----------|
|                             | < 10,000          | > 10,000 < 25,000 | > 25,000 < 40,000 | > 40,000         |           |
| <b>Lower Education</b>      |                   |                   |                   |                  |           |
| <b>(n = 6,101, 46.0%)</b>   | <b>(n=829)</b>    | <b>(n=3,745)</b>  | <b>(n=1,260)</b>  | <b>(n=267)</b>   |           |
| Mediterranean Diet          | 4.33 (1.60)       | 4.43 (1.63)       | 4.44 (1.60)       | 4.59 (1.64)      | 0.040     |
| Italian Mediterranean Index | 3.19 (1.61)       | 3.13 (1.67)       | 3.22 (1.69)       | 3.54 (1.73)      | 0.0002    |
| <b>Medium Education</b>     |                   |                   |                   |                  |           |
| <b>(n = 5,236, 39.5%)</b>   | <b>(n=137)</b>    | <b>(n=1,746)</b>  | <b>(n=2,184)</b>  | <b>(n=1,169)</b> |           |
| Mediterranean Diet          | 4.16 (1.64)       | 4.33 (1.60)       | 4.50 (1.63)       | 4.54 (1.67)      | 0.0041    |
| Italian Mediterranean Index | 3.21 (1.67)       | 3.14 (1.69)       | 3.33 (1.73)       | 3.43 (1.81)      | <.0001    |
| <b>Higher Education</b>     |                   |                   |                   |                  |           |
| <b>(n = 1,922, 14.5%)</b>   | <b>(n=13)</b>     | <b>(n=258)</b>    | <b>(n=676)</b>    | <b>(n=975)</b>   |           |
| Mediterranean Diet          | 5.61 (1.85)       | 4.43 (1.61)       | 4.38 (1.60)       | 4.50 (1.76)      | 0.067     |
| Italian Mediterranean Index | 3.77 (2.68)       | 3.43 (1.63)       | 3.33 (1.70)       | 3.56 (1.77)      | 0.041     |

\*P value adjusted for sex, age, energy intake, BMI, physical activity, smoking, alcohol consumption, marital status

## REFERENCES

1. Sofi F, Abbate R, Gensini GF, et al. Accruing evidence on benefits of adherence to the Mediterranean diet on health: an updated systematic review and meta-analysis. *Am J Clin Nutr.* 2010;92:1189-96.
2. ~~Bonaccio M, Iacoviello L, de Gaetano G, et al. The Mediterranean diet: The reasons for a success. *Thromb Res.* 2012 ;129:401-4~~
3. ~~de Lorgeril M, Salen P, Martin JL, Monjaud I, Delaye J, Mamelle N. Mediterranean diet, traditional risk factors, and the rate of cardiovascular complications after myocardial infarction: final report of the Lyon Diet Heart Study. *Circulation.* 1999;99:779-85.~~
4. ~~de Lorgeril M, Salen P, Martin JL, Monjaud I, Boucher P, Mamelle N. Mediterranean dietary pattern in a randomized trial: prolonged survival and possible reduced cancer rate. *Arch Intern Med.* 1998;158:1181-7.~~
5. ~~<http://www.unesco.org/culture/ich/en/RL/00394>~~
5. Keys A. Seven countries. A multivariate analysis of death, coronary heart disease. Cambridge MA: Harvard University Press; 1980.
6. ~~Laccetti R, Pota A, Stranges S, et al. Evidence on the prevalence and geographic distribution of major cardiovascular risk factors in Italy. *Public Health Nutr.* 2012;30:1-11~~
7. ~~Bonaccio M, Iacoviello L, de Gaetano G. The Mediterranean diet: The reasons for a success. *Thromb Res.* 2012 ;129:401-4~~
- 7.
8. Prentice AM. The emerging epidemic of obesity in developing countries. *Int J Epidemiol.* 2006;35:93-9

- 1
- 2
- 3
- 4 9. Lopez CN, Martinez-Gonzalez MA, Sanchez-Villegas A, et al. Costs of Mediterranean and
- 5 western dietary patterns in a Spanish cohort and their relationship with prospective weight
- 6 change. *J Epidemiol Community Health*. 2009;63:920-7
- 7
- 8
- 9
- 10 10. Darmon N, Drewnowski A. Does social class predict diet quality? *Am J Clin Nutr*.
- 11 2008;87:1107-17
- 12
- 13
- 14 11. Esposito K, Kastorini CM, Panagiotakos DB, et al. Mediterranean diet and weight loss:
- 15 meta-analysis of randomized controlled trials. *Metab Syndr Relat Disord*. 2011;9:1-12.
- 16
- 17
- 18 12. Schröder H, Marrugat J, Covas MI. High monetary costs of dietary patterns associated with
- 19 lower body mass index: a population-based study. *Int J Obes (Lond)*. 2006;30:1574-9.
- 20
- 21
- 22 13. Iacoviello L, Bonanni A, Costanzo S, et al. The Moli-sani Project, a randomized,
- 23 prospective cohort study in the Molise region in Italy; design, rationale and objectives.
- 24 *Italian J Public Health* 2007; 4: 110-8
- 25
- 26
- 27 14. Pala V, Sieri S, Palli D, et al. Diet in the Italian EPIC cohorts: presentation of data and
- 28 methodological issues. *Tumori*. 2003;89:594-607
- 29
- 30
- 31 15. Pisani P, Faggiano F, Krogh V, et al. Relative validity and reproducibility of a food
- 32 frequency dietary questionnaire for use in the Italian EPIC centres. *Int J Epidemiol*. 1997;26
- 33 (Suppl. 1): S152-60
- 34
- 35
- 36 16. Centritto F, Iacoviello L, di Giuseppe R, et al. Dietary patterns, cardiovascular risk factors
- 37 and C-reactive protein in a healthy Italian population. *Nutr Metab Cardiovasc Dis*.
- 38 2009;19:697-706
- 39
- 40
- 41 17. Trichopoulou A, Orfanos P, Norat T, et al. Modified Mediterranean diet and survival: EPIC-
- 42 elderly prospective cohort study. *BMJ*. 2005;330 (7498):991.
- 43
- 44
- 45 18. Agnoli C, Krogh V, Grioni S, et al. A priori-defined dietary patterns are associated with
- 46 reduced risk of stroke in a large Italian cohort. *J Nutr*. 2011;141:1552-8
- 47
- 48
- 49
- 50
- 51
- 52
- 53
- 54
- 55
- 56
- 57
- 58
- 59
- 60

- 1  
2  
3  
4 19. Janssen I, Katzmarzyk PT, Ross R. Body mass index, waist circumference, and health risk:  
5  
6 evidence in support of current National Institutes of Health guidelines. *Arch Intern Med*  
7  
8 2002;162:2074–2079  
9
- 10 20. Nielsen NR, Schnohr P, Jensen G, et al. Is the relationship between type of alcohol and  
11  
12 mortality influenced by socio-economic status? *J Intern Med.* 2004;255:280-8.  
13
- 14 21. Sofi F, Cesari F, Abbate R, et al. Adherence to Mediterranean diet and health status: meta-  
15  
16 analysis. *BMJ.* 2008;337: a1344.  
17
- 18 22. Mehio Sibai A, Nasreddine L, Mokdad AH, et al. Nutrition transition and cardiovascular  
19  
20 disease risk factors in Middle East and North Africa countries: reviewing the evidence. *Ann*  
21  
22 *Nutr Metab.* 2010;57:193-203.  
23
- 24 23. Panagiotakos DB, Pitsavos C, Chrysohoou C, et al. Dietary habits mediate the relationship  
25  
26 between socio-economic status and CVD factors among healthy adults: the ATTICA study.  
27  
28 *Public Health Nutr.* 2008;11:1342-9  
29
- 30 24. Shahar D, Shai I, Vardi H, et al. Diet and eating habits in high and low socioeconomic  
31  
32 groups. *Nutrition.* 2005;21:559-66  
33
- 34 25. Aggarwal A, P Monsivais P, Cook AJ et al. Does diet cost mediate the relation between  
35  
36 socioeconomic position and diet quality? *European Journal of Clinical Nutrition* 2011;  
37  
38 65:1059-1066  
39
- 40 [26. Dalziel K, Segal L, de Lorgeril M. A mediterranean diet is cost-effective in patients with](#)  
41  
42 [previous myocardial infarction. \*J Nutr.\* 2006 Jul;136\(7\):1879-85.](#)  
43
- 44 [27. McLaren L. Socioeconomic status and obesity. \*Epidemiol Rev.\* 2007;29:29-48.](#)  
45  
46
- 47 ~~26-28.~~ Shrewsbury V, Wardle J. Socioeconomic status and adiposity in childhood: A  
48  
49 systematic review of cross-sectional studies 1990–2005. *Obesity* 2008;16:275–284  
50
- 51 ~~27-29.~~ The epidemiological evidence supporting a causal link between Mediterranean diets  
52  
53 and body weight is contrasting. Buckland G, Bach A, Serra-Majem L. *Obesity and the*  
54  
55  
56  
57  
58  
59  
60

1  
2  
3  
4 Mediterranean diet: a systematic review of observational and intervention studies. *Obes Rev*  
5  
6 2008;9:582-93.  
7  
8  
9

10  
11 [30. Darmon N, Ferguson EL, Briand A. A cost constraint alone has adverse effects on food](#)  
12 [selection and nutrient density: an analysis of human diets by linear programming. \*J Nutr\*](#)  
13 [2002;132:3764-71.](#)  
14  
15  
16

17  
18 ~~28.~~31. Groth MV, Fagt S, Brøndsted L. Social determinants of dietary habits in Denmark.,  
19  
20 *Eur J Clin Nutr.* 2001;55:959-66.  
21

22  
23 ~~29.~~32. Kaplan GA, Keil JE. Socioeconomic factors and cardiovascular disease: a review of  
24  
25 the literature. *Circulation.* 1993;88:1973-98.  
26

27  
28 ~~30.~~33. Giampaoli S, Rielli R, Dematté L, et al. The Italian observatory of cardiovascular  
29  
30 risk: the CUORE project experience [abstract]. *Circulation.* 2009;119:139.  
31

32 [34.](#) Diez-Roux AV, Nieto FJ, Caulfield L, et al. Neighbourhood differences in diet: the  
33  
34 Atherosclerosis Risk in Communities (ARIC) Study. *J Epidemiol Community Health.*  
35  
36 1999;53: 55–63.  
37

38 ~~31.~~  
39  
40  
41  
42  
43  
44  
45  
46  
47  
48  
49  
50  
51  
52  
53  
54  
55  
56  
57  
58  
59  
60

1  
2  
3  
4 **CONTRIBUTORS:** (MB, AB, LI designed the research; FDL, MB, managed data collection; MB,  
5  
6 ADC analyzed the data; MB, AB wrote the paper, MBD, GdG, LI originally inspired the research,  
7  
8 obtained the financial support and critically reviewed the manuscript). All Authors had full access  
9  
10 to all data in the study and took responsibility for the integrity of the data and the accuracy of the  
11  
12 data analysis. None of the Authors had a personal or financial conflict of interest.  
13  
14

### 17 **FUNDING**

18  
19 The enrolment phase of the Moli-sani Project was supported by research grants from Pfizer  
20  
21 Foundation (Rome, Italy) and the Italian Ministry of University and Research (MIUR, Rome,  
22  
23 Italy)—Programma Triennale di Ricerca, Decreto no.1588. Neither Pfizer Foundation nor MIUR had  
24  
25 any role in study design, collection, analysis, and interpretation of data; in the writing of the report;  
26  
27 and in the decision to submit the article for publication.  
28  
29

30 All Authors are independent from funders.  
31  
32

### 35 **COMPETING INTEREST**

36  
37 None  
38  
39

40  
41 **ETHICAL ISSUES:** The Moli-sani study was approved by the Ethics Committee of the Catholic  
42  
43 University of Rome. Participants signed the informed consent before taking part in the study.  
44  
45  
46  
47

48 **DATA SHARING:** no additional data available.  
49  
50  
51  
52  
53  
54  
55  
56  
57  
58  
59  
60
